# Supplementary material for: Discovery of Novel Imidazopyridine GSK-3β Inhibitors Supported by Computational Approaches
Source: PubMed Central journal article supplement (PMC7248956; doi:10.3390/molecules25092163), 2020-05-05

Supplementary Materials

# Discovery of Novel Imidazopyridine GSK-3 $\beta$ Inhibitors Supported by Computational Approaches

Rosa Buonfiglio, Federica Prati, Martina Bischetti, Claudia Cavarischia, Guido Furlotti, and Rosella Ombrato \*

Angelini Pharma S.p.A., Viale Amelia, 70 - 00181 Rome, Italy

\* Correspondence: rosella.ombrato@angelinipharma.com

| Table of contents                                                   | Pg      |
|---------------------------------------------------------------------|---------|
| Figure S1                                                           | S2      |
| Figure S2                                                           | S3      |
| Figure S3                                                           | S4      |
| Figure S4                                                           | S5      |
| Figure S5                                                           | S6      |
| Figure S6                                                           | S6      |
| Figure S7                                                           | S7      |
| Table S1                                                            | S7      |
| Table S2                                                            | S8      |
| Table S3                                                            | S8      |
| HPLC analysis data of final compounds                               | S10-S21 |
| <sup>1</sup> HNMR and <sup>13</sup> CNMR spectra of final compounds | S22-S31 |
| 2D NMR of compounds <b>2</b> , <b>8</b> and <b>14</b>               | S32-S37 |

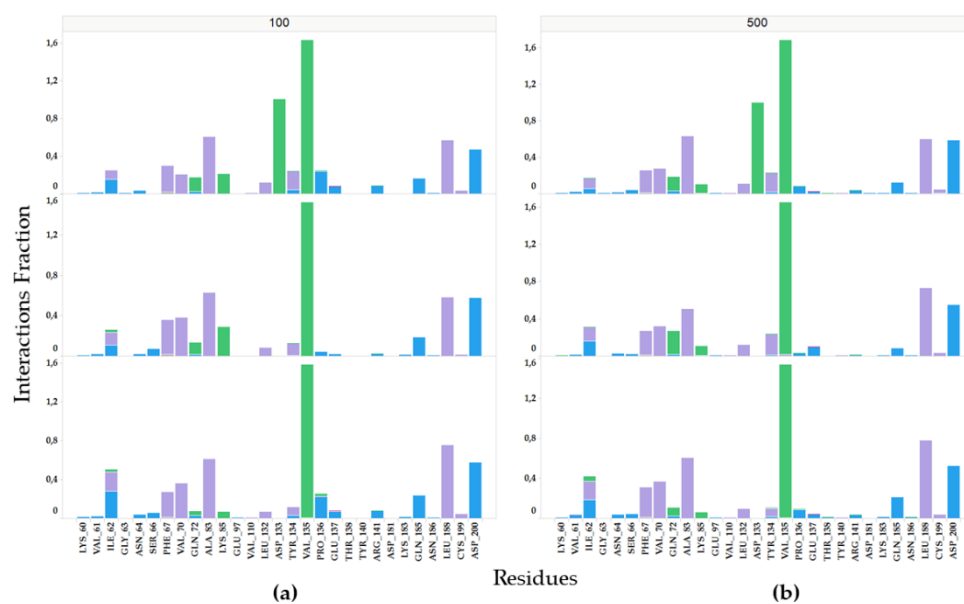

**Figure S1.** Ligand-Protein interactions monitored throughout 100 ns **(a)** and 500 ns **(b)** simulations. The upper, middle and lower panel correspond to **2**, **8** and **14** complexes. The interactions are categorized as follows: H-bonds (green), Hydrophobic (purple), Ionic (fuchsia), Water Bridges (cyan), Pi-Cation (yellow), Pi-Pi (grey). The stacked bar charts are normalized over the course of the trajectory. The unconventional deep H-bond involving C-Ha and Asp133 is not detected by default in the Simulation Interaction Diagram tool, therefore the interaction fraction of Asp133 approaches zero in **8** and **14** (both 100 and 500 ns timeline) compared to **2**.

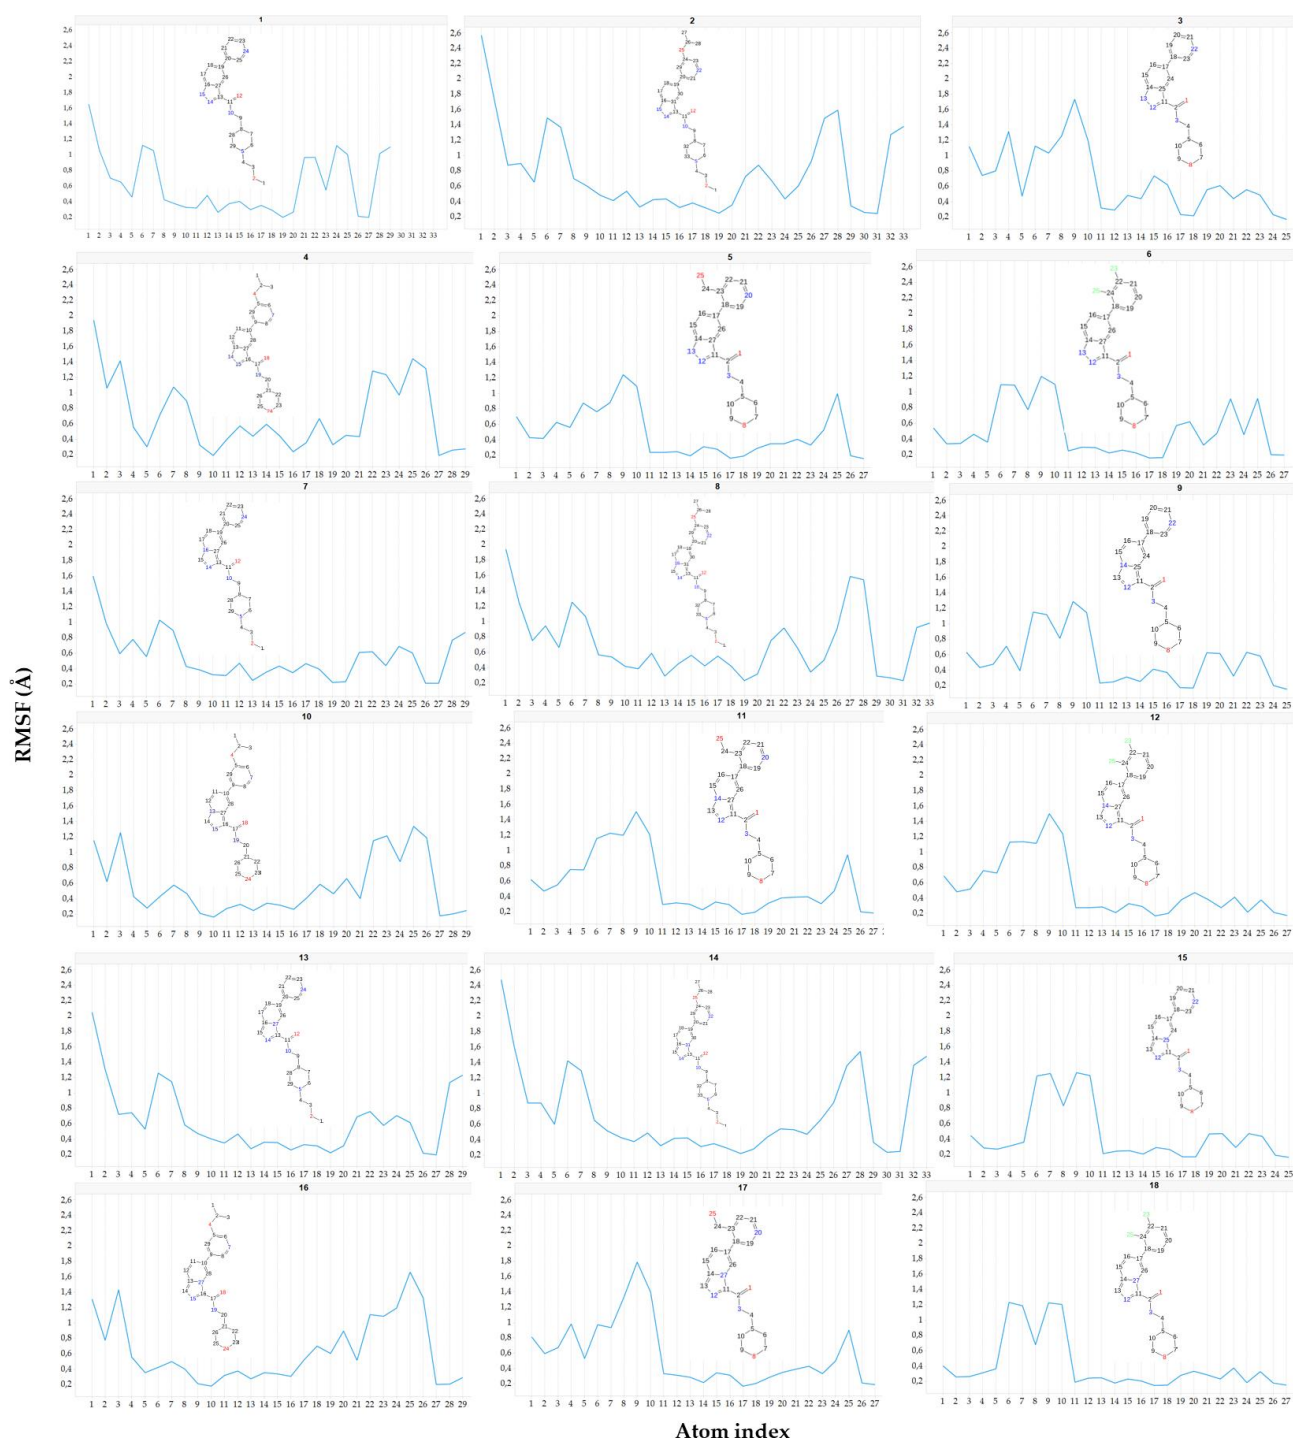

**Figure S2.** Ligand RMSF from each MD simulation broken down by atom, corresponding to the 2D structure within the plot. Compound ID is reported in the grey row on the top part of each plot.

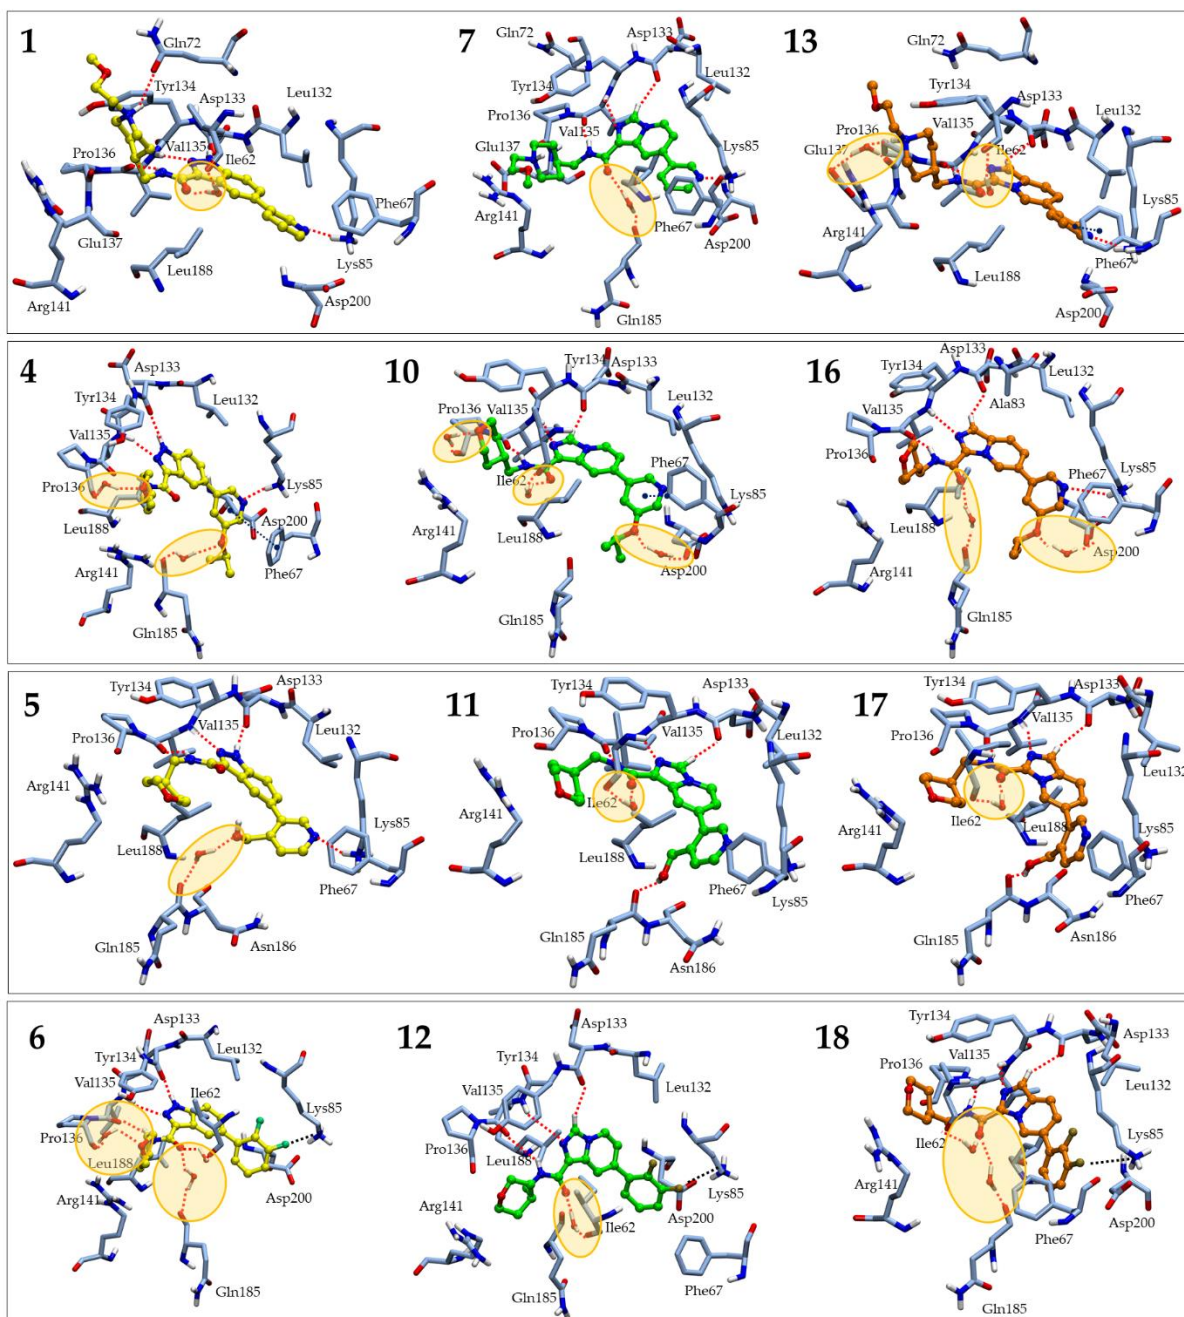

**Figure S3.** Representative snapshots from MD simulations. INDZ, IMID 1, and IMID 2 derivatives are reported as yellow, green and orange ball and sticks representation, respectively. The most relevant interactions are represented with dashed lines. Water mediated contacts are highlighted with yellow circles.

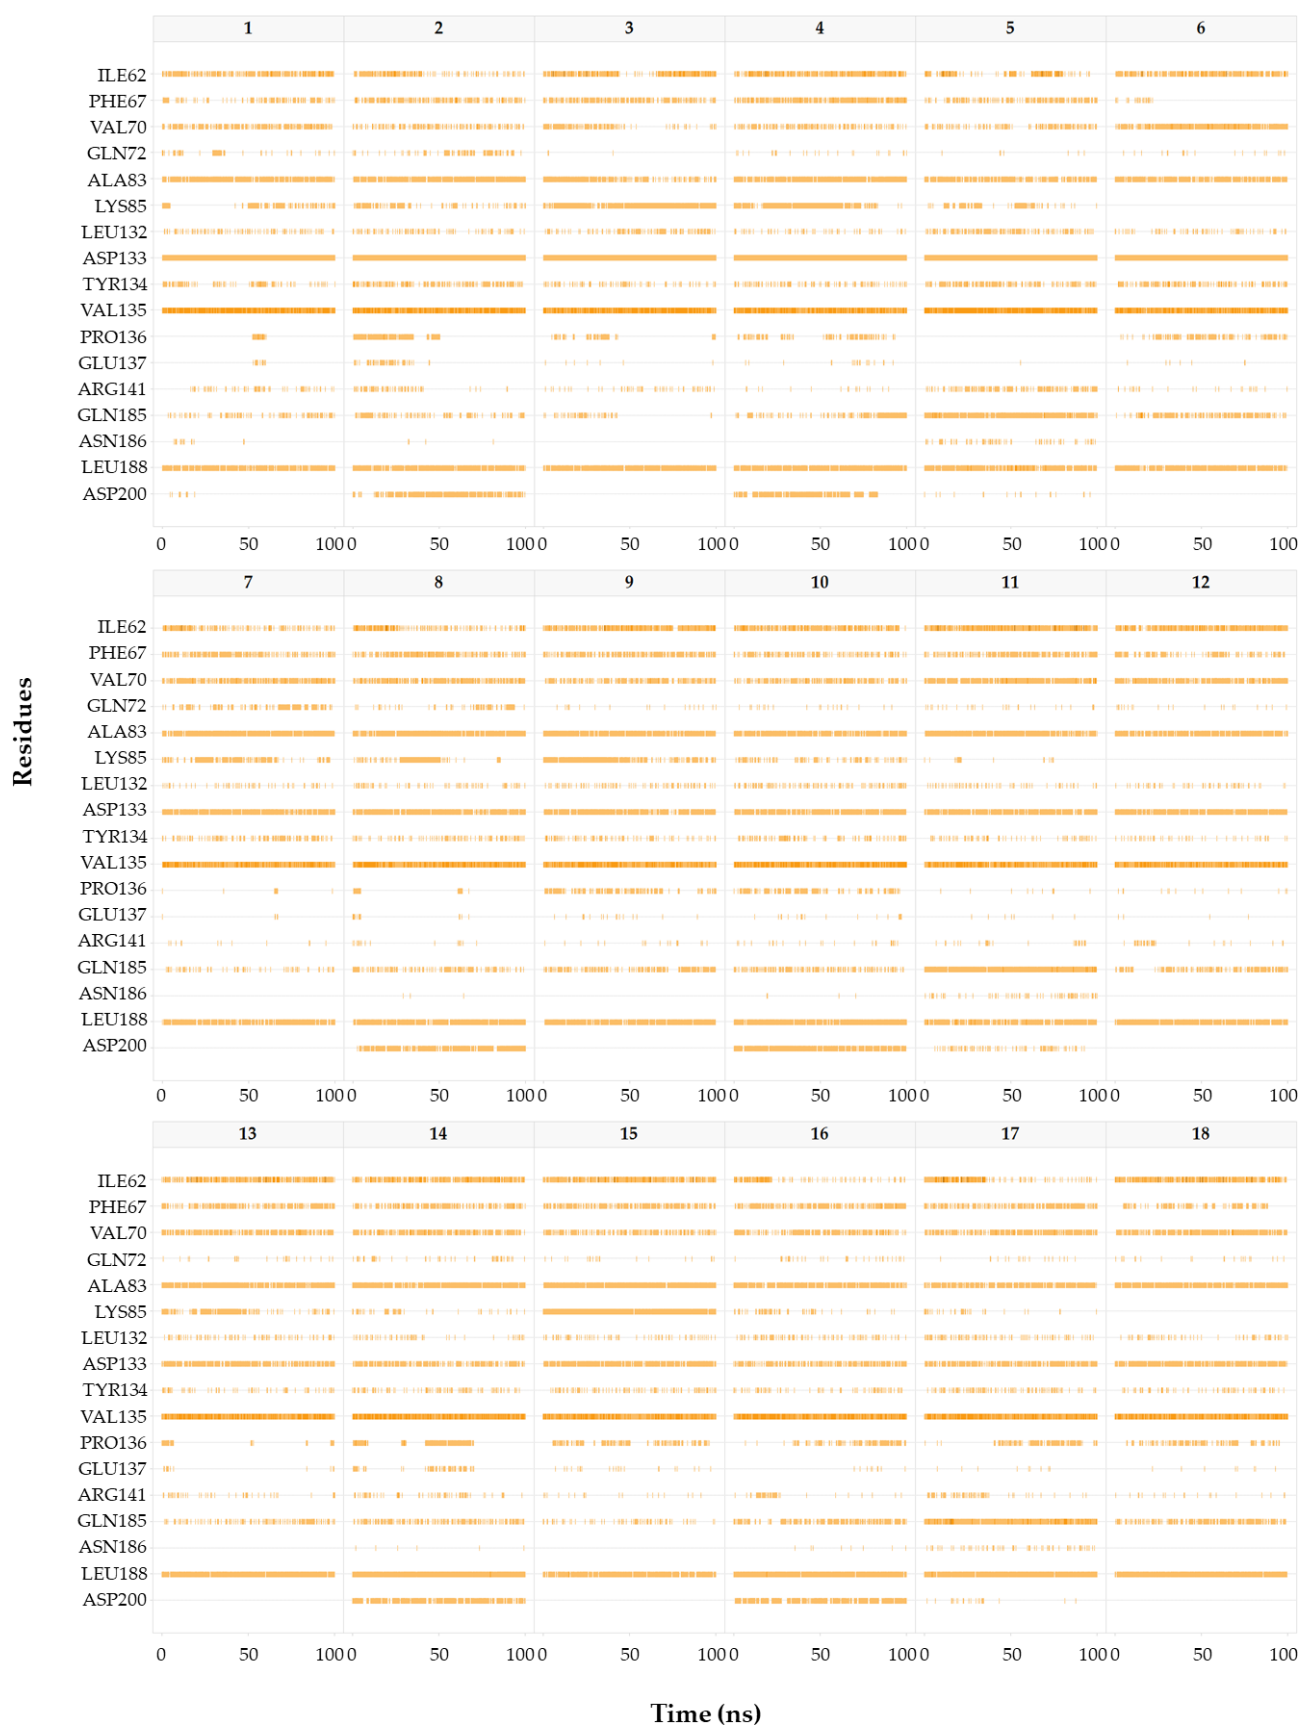

**Figure S4.** Timeline representation of the interactions along 100 ns simulations for each compound. The top, medium and bottom row refer to 1-6 (INDZ), 7-12 (IMID 1) and 13-18 (IMID 2) derivatives. Residues making more than one specific contact with the ligand are represented by a darker shade of orange.

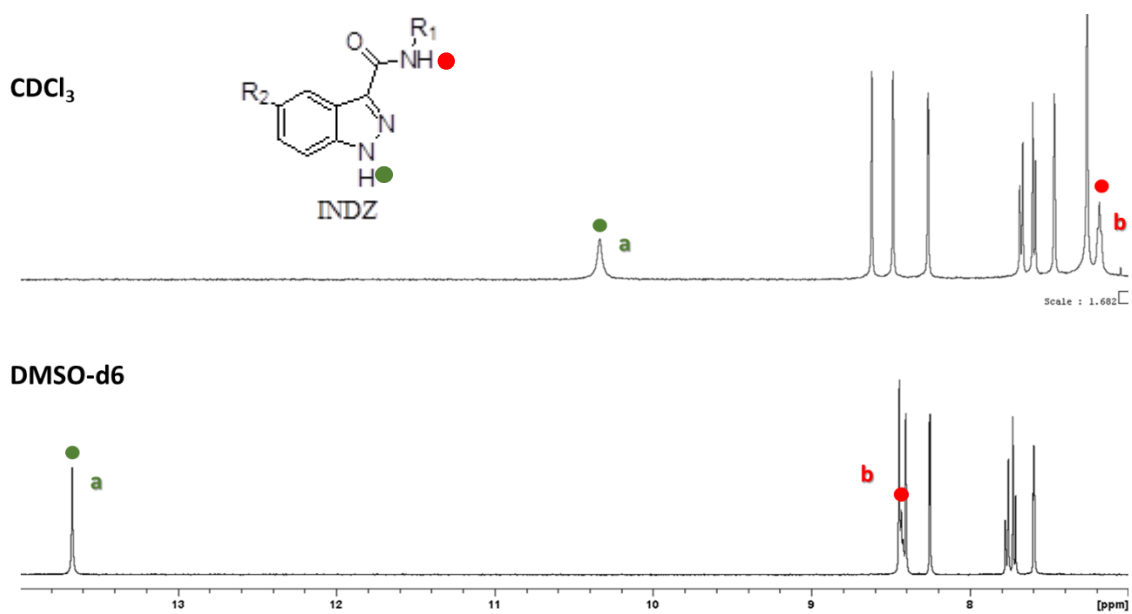

**Figure S5.** <sup>1</sup>H-NMR spectrum (500 MHz) of compound **2** in CDCl<sub>3</sub> (upper panel) and DMSO-d<sub>6</sub> (lower panel) at 298 K. Ha and Hb are reported as a and b, respectively.

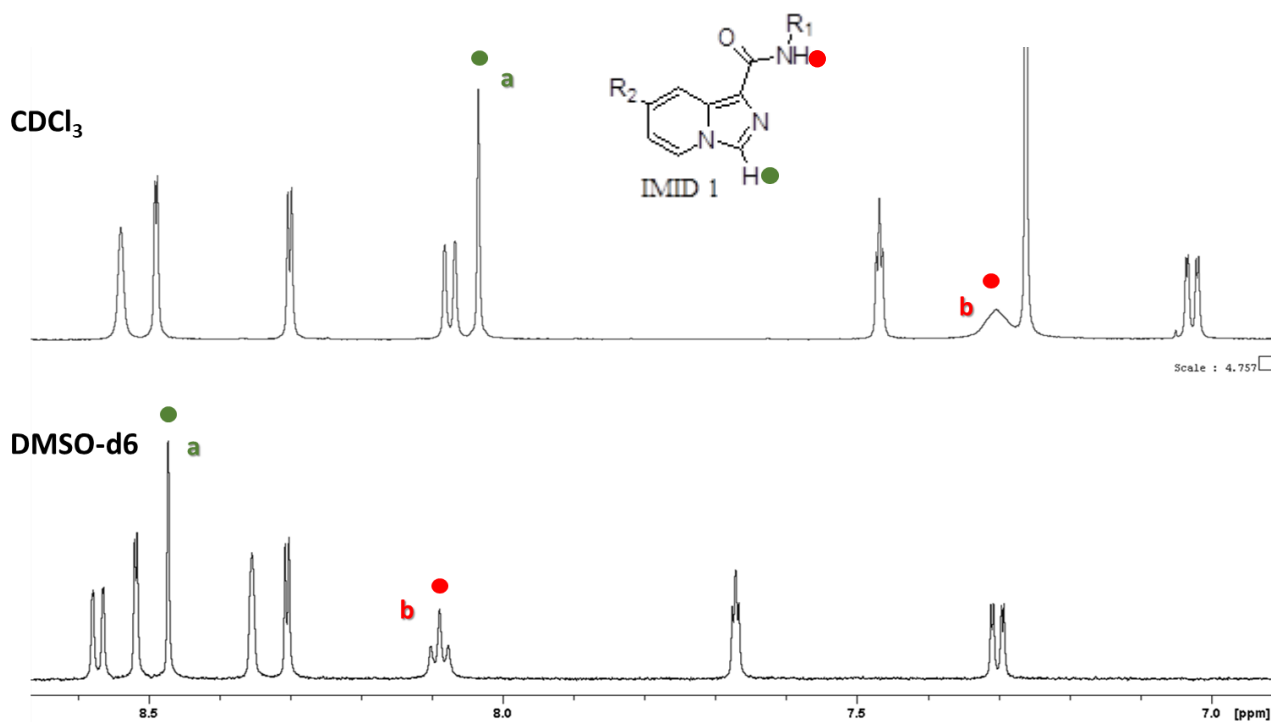

**Figure S6.** <sup>1</sup>H-NMR spectrum (500 MHz) of compound **8** in CDCl<sub>3</sub> (upper panel) and DMSO-d<sub>6</sub> (lower panel) at 298 K. Ha and Hb are reported as a and b, respectively.

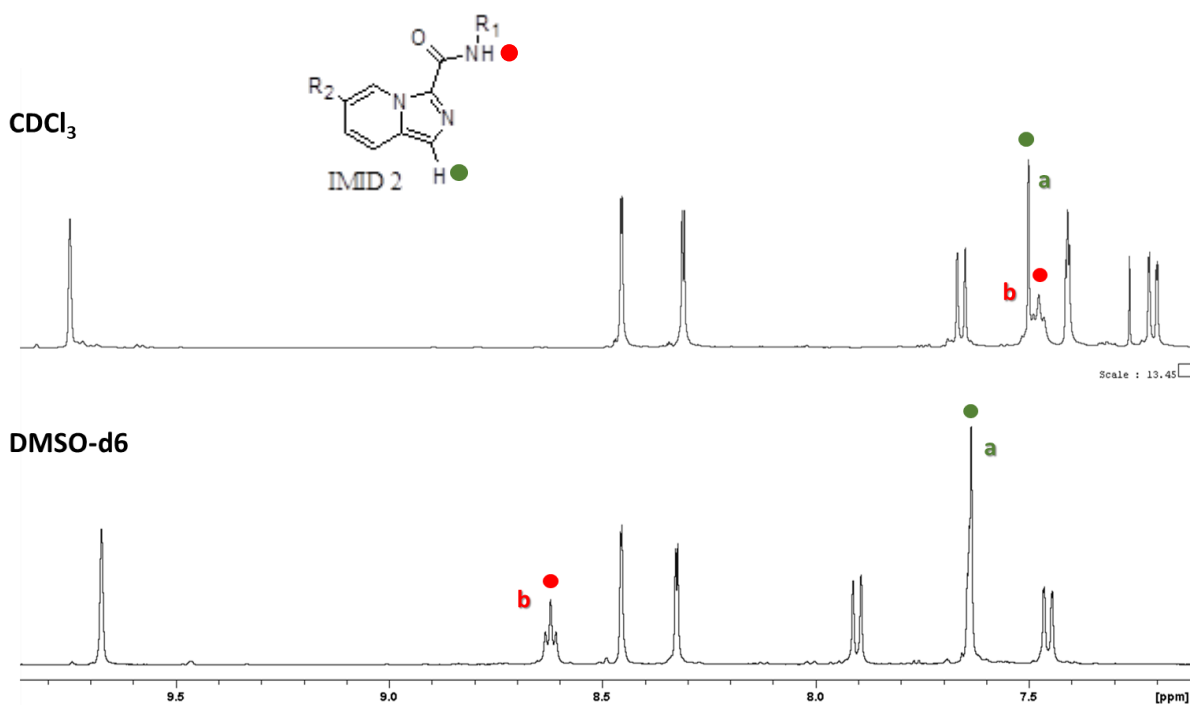

**Figure S7.** <sup>1</sup>H-NMR spectrum (500 MHz) of compound **14** in CDCl<sub>3</sub> (upper panel) and DMSO-d<sub>6</sub> (lower panel) at 298 K. Ha and Hb are reported as a and b, respectively.

**Table S1:** Percentage of interaction of the outer and central H-bond across each MD trajectory

| Cmpd | Core   | Outer H-bond (%) | Central H-bond (%) |
|------|--------|------------------|--------------------|
| 1    | INDZ   | 98               | 74                 |
| 7    | IMID 1 | 98               | 43                 |
| 13   | IMID 2 | 98               | 55                 |
| 2    | INDZ   | 98               | 64                 |
| 8    | IMID 1 | 99               | 52                 |
| 14   | IMID 2 | 99               | 58                 |
| 3    | INDZ   | 93               | 70                 |
| 9    | IMID 1 | 97               | 47                 |
| 15   | IMID 2 | 99               | 46                 |
| 4    | INDZ   | 94               | 55                 |
| 10   | IMID 1 | 98               | 64                 |
| 16   | IMID 2 | 99               | 61                 |
| 5    | INDZ   | 89               | 76                 |
| 11   | IMID 1 | 89               | 45                 |
| 17   | IMID 2 | 94               | 55                 |
| 6    | INDZ   | 92               | 58                 |
| 12   | IMID 1 | 91               | 46                 |
| 18   | IMID 2 | 97               | 48                 |

**Table S2.** Data collection and model statistics of crystal structure of **2** in complex with GSK-3 $\beta$  enzyme (PDB entry 6Y9R)

| <b>Ligand</b>                                | <b>2</b>              |
|----------------------------------------------|-----------------------|
| X-ray source                                 | PXI/X06SA (SLS)       |
| Wavelength [ $\text{\AA}$ ]                  | 1.0000                |
| Detector                                     | EIGER X 16M           |
| Temperature [K]                              | 100                   |
| Space group                                  | C 2 2 2 <sub>1</sub>  |
| Cell: a; b; c; [ $\text{\AA}$ ]              | 84.58; 108.29; 103.47 |
| $\alpha$ ; $\beta$ ; $\gamma$ ; [ $^\circ$ ] | 90.0; 90.0; 90.0      |
| Resolution [ $\text{\AA}$ ]                  | 2.08 (2.33-2.08)      |
| Unique reflections                           | 28265 (7982)          |
| Multiplicity                                 | 5.2 (5.2)             |
| Completeness [%]                             | 97.8 (97.2)           |
| R <sub>sym</sub> [%]                         | 5.5 (43.5)            |
| R <sub>meas</sub> [%]                        | 6.1 (48.3)            |
| Mean(I)/sd                                   | 16.89 (4.23)          |
| Number of reflections (working /test)        | 26594 / 1671          |
| R <sub>cryst</sub> [%]                       | 18.9                  |
| R <sub>free</sub> [%]2                       | 22.6                  |
| Total number of atoms:                       |                       |
| Protein                                      | 2863                  |
| Water                                        | 133                   |
| Ligand                                       | 33                    |
| Acetate                                      | 4                     |
| Glycerol                                     | 12                    |
| Deviation from ideal geometry:               |                       |
| Bond lengths [ $\text{\AA}$ ]                | 0.008                 |
| Bond angles [ $^\circ$ ]                     | 1.37                  |
| Bonded B's [ $\text{\AA}^2$ ]                | 4.2                   |
| Ramachandran plot:                           |                       |
| Most favoured regions [%]                    | 90.5                  |
| Additional allowed regions [%]               | 9.2                   |
| Generously allowed regions [%]               | 0.0                   |
| Disallowed regions [%]                       | 0.3                   |



**Table S3.** Data collection and model statistics of crystal structure of **16** in complex with GSK-3 $\beta$  enzyme (PDB entry 6Y9S)

| <b>Ligand</b>                         | <b>16</b>           |
|---------------------------------------|---------------------|
| X-ray source                          | PXII/X10SA (SLS)    |
| Wavelength [Å]                        | 1.0000              |
| Detector                              | PILATUS 6M          |
| Temperature [K]                       | 100                 |
| Space group                           | P 2 <sub>1</sub>    |
| Cell: a; b; c; [Å]                    | 67.11; 96.19; 67.56 |
| $\alpha$ ; $\beta$ ; $\gamma$ ; [°]   | 90.0; 103.6; 90.0   |
| Resolution [Å]                        | 2.03 (2.28-2.03)    |
| Unique reflections                    | 50808 (14391)       |
| Multiplicity                          | 2.0 (1.9)           |
| Completeness [%]                      | 94.2 (91.4)         |
| R <sub>sym</sub> [%]                  | 5.5 (44.8)          |
| R <sub>meas</sub> [%]                 | 7.4 (59.9)          |
| Mean(I)/sd                            | 9.63 (1.78)         |
| Number of reflections (working /test) | 49126 / 1682        |
| R <sub>cryst</sub> [%]                | 20.2                |
| R <sub>free</sub> [%]2                | 24.9                |
| Total number of atoms:                |                     |
| Protein                               | 5501                |
| Water                                 | 282                 |
| Ligand                                | 58                  |
| Acetate                               | 12                  |
| Deviation from ideal geometry:        |                     |
| Bond lengths [Å]                      | 0.011               |
| Bond angles [°]                       | 1.51                |
| Bonded B's [Å <sup>2</sup> ]          | 5.1                 |
| Ramachandran plot:                    |                     |
| Most favoured regions [%]             | 92.3                |
| Additional allowed regions [%]        | 7.0                 |
| Generously allowed regions [%]        | 0.3                 |
| Disallowed regions [%]                | 0.3                 |

### HPLC analysis data of final compounds

Injection Volume 5 uL

Detector UV (252 nm)

Mobile Phase CH3CN + 0.01%TFA/Water+0.01%TFA (10:90 v/v)

Temperature 25°C

Column Name Xbridge C18

Length 15 cm

Diameter 0.46 cm

Particle Size 5 um

Column Flow Rate 2 ml/min

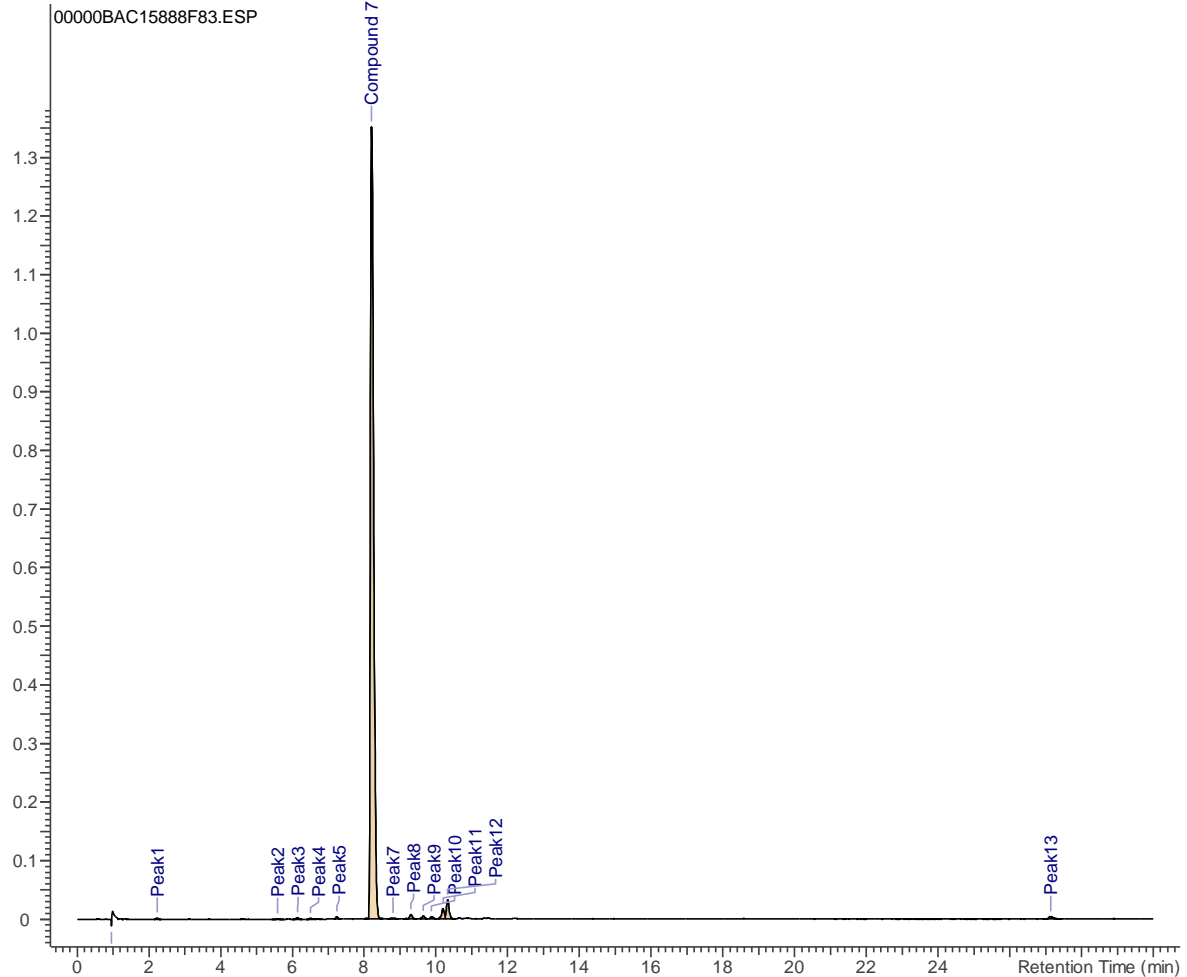

| No. | Name       | tR    | Peak Area<br>(Y units*ms) | Area Percent | Width | Height   |
|-----|------------|-------|---------------------------|--------------|-------|----------|
| 1   | Peak1      | 2.23  | 8.334                     | 0.096        | 0.121 | 1.816    |
| 2   | Peak2      | 5.58  | 5.613                     | 0.064        | 0.128 | 0.894    |
| 3   | Peak3      | 6.14  | 13.612                    | 0.156        | 0.115 | 2.799    |
| 4   | Peak4      | 6.50  | 8.073                     | 0.093        | 0.125 | 1.458    |
| 5   | Peak5      | 7.23  | 16.448                    | 0.189        | 0.116 | 3.675    |
| 6   | Compound 7 | 8.21  | 8285.923                  | 95.059       | 0.165 | 1351.611 |
| 7   | Peak7      | 8.81  | 11.478                    | 0.132        | 0.227 | 1.420    |
| 8   | Peak8      | 9.30  | 37.914                    | 0.435        | 0.131 | 6.973    |
| 9   | Peak9      | 9.64  | 22.774                    | 0.261        | 0.126 | 4.767    |
| 10  | Peak10     | 9.88  | 16.371                    | 0.188        | 0.135 | 3.247    |
| 11  | Peak11     | 10.20 | 89.828                    | 1.031        | 0.133 | 17.647   |
| 12  | Peak12     | 10.33 | 160.495                   | 1.841        | 0.126 | 32.108   |
| 13  | Peak13     | 27.13 | 39.783                    | 0.456        | 0.232 | 4.223    |

**Sampling Rate** 120.0017  
**Injection Volume** 5  $\mu$ L  
**Detector** UV (231 nm)  
**Mobile Phase A** Acetonitrile  
**Mobile Phase B** 10mM KH<sub>2</sub>PO<sub>4</sub> pH3HClO<sub>4</sub>  
**Gradient** 99-54B (30 min)  
**Temperature** 25°C  
**Column Name** Xbridge C18  
**Length** 15 cm  
**Diameter** 0.46 cm  
**Particle Size** 5  $\mu$ m  
**Column Flow Rate** 2 ml/min

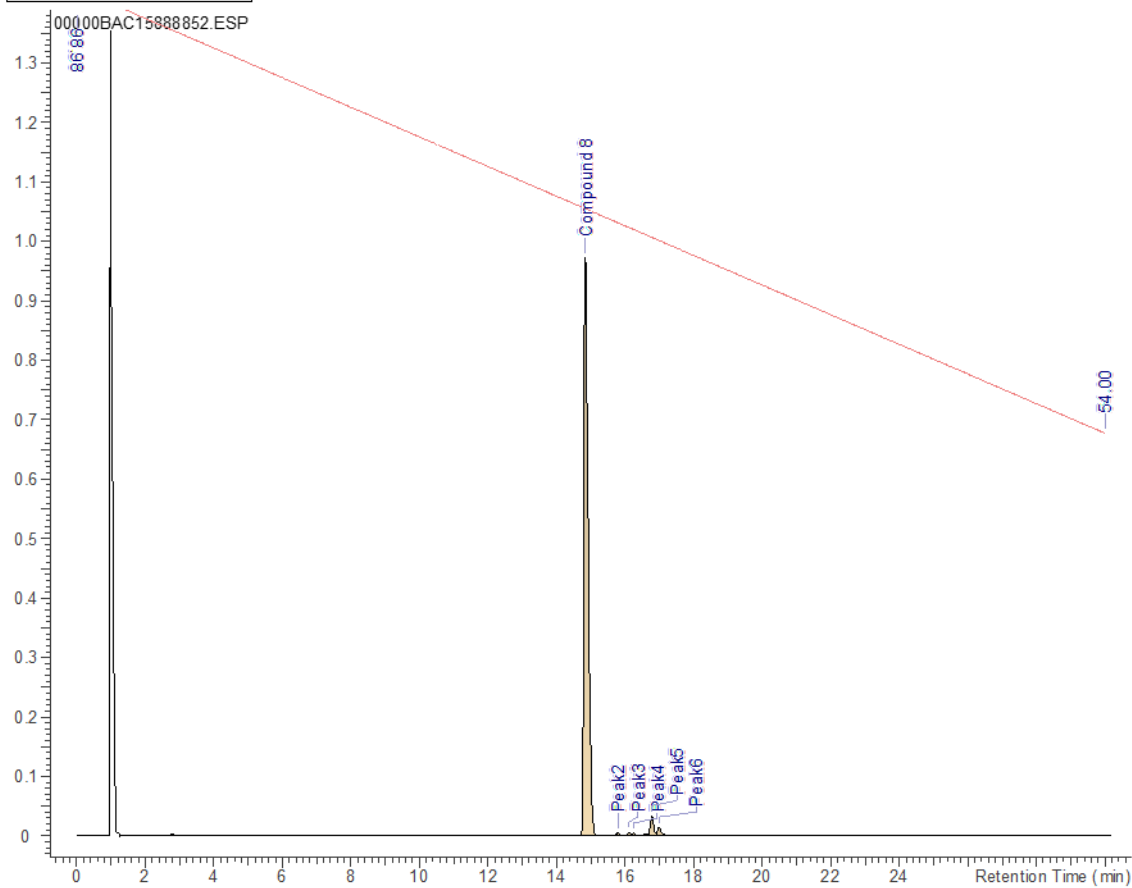

| No. | Name       | tR    | Peak Area (Y units*ms) | Area Percent | Width | Height  |
|-----|------------|-------|------------------------|--------------|-------|---------|
| 1   | Compound 8 | 14.84 | 8553.905               | 95.652       | 0.238 | 971.057 |
| 2   | Peak2      | 15.79 | 25.038                 | 0.280        | 0.190 | 3.306   |
| 3   | Peak3      | 16.11 | 27.699                 | 0.310        | 0.069 | 4.697   |
| 4   | Peak4      | 16.24 | 25.948                 | 0.290        | 0.109 | 3.686   |
| 5   | Peak5      | 16.78 | 210.063                | 2.349        | 0.166 | 32.439  |
| 6   | Peak6      | 16.99 | 100.119                | 1.120        | 0.176 | 13.614  |

|                         |                 |
|-------------------------|-----------------|
| <b>Injection Volume</b> | 5 uL            |
| <b>Detector</b>         | UV (252 nm)     |
| <b>Mobile Phase A</b>   | ACN+0.01%TFA    |
| <b>Mobile Phase B</b>   | water+0.01%TFA  |
| <b>Gradient</b>         | 99-54B (30 min) |
| <b>Temperature</b>      | 25°C            |
| <b>Column Name</b>      | Xbridge C18     |
| <b>Length</b>           | 15 cm           |
| <b>Diameter</b>         | 0.46 cm         |
| <b>Particle Size</b>    | 5 um            |
| <b>Column Flow Rate</b> | 2 ml/min        |

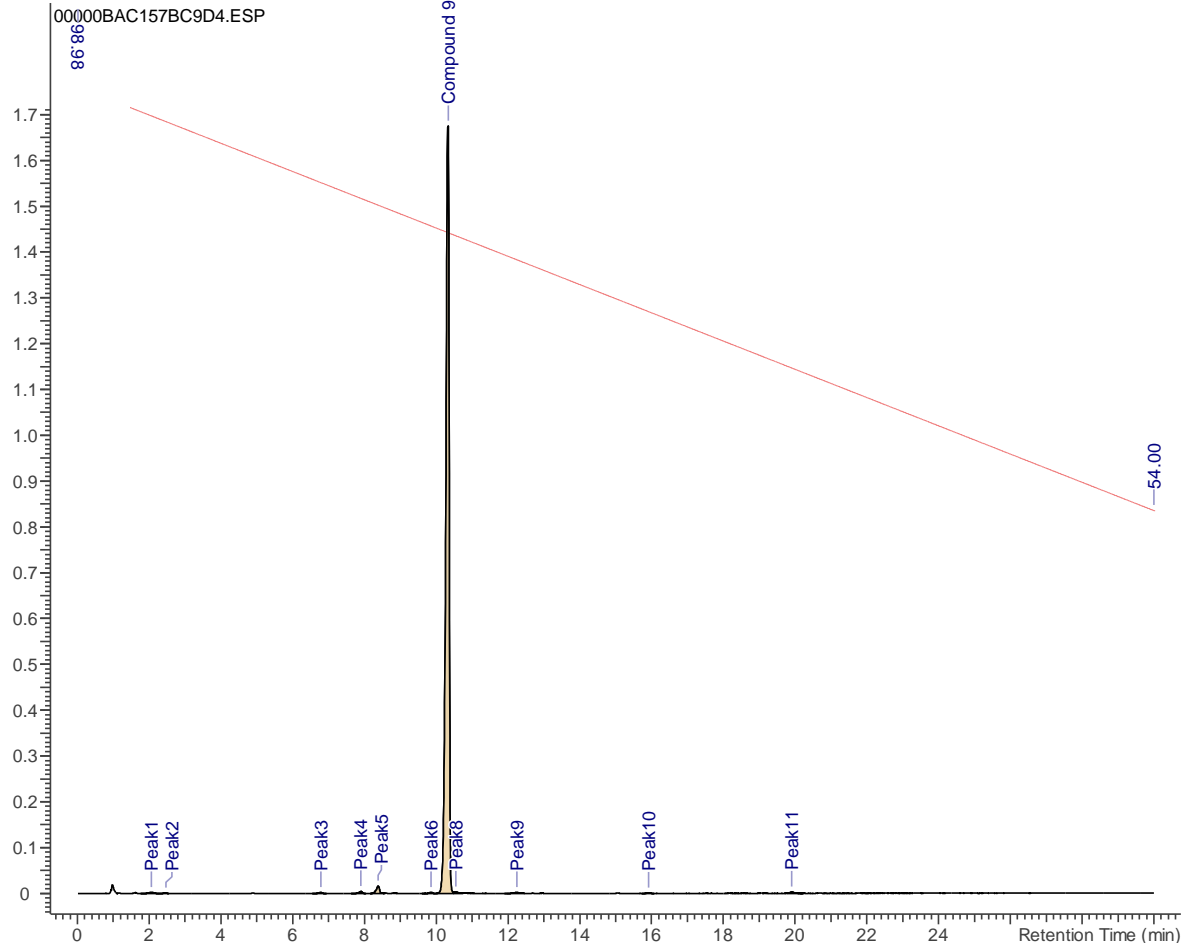

| No. | Name       | tR    | Peak Area (Y units*ms) | Area Percent | Width | Height   |
|-----|------------|-------|------------------------|--------------|-------|----------|
| 1   | Peak1      | 2.05  | 20.771                 | 0.190        | 0.274 | 1.867    |
| 2   | Peak2      | 2.47  | 8.073                  | 0.074        | 0.165 | 1.303    |
| 3   | Peak3      | 6.79  | 13.309                 | 0.122        | 0.141 | 2.219    |
| 4   | Peak4      | 7.90  | 27.044                 | 0.247        | 0.152 | 4.270    |
| 5   | Peak5      | 8.38  | 98.225                 | 0.897        | 0.150 | 16.143   |
| 6   | Peak6      | 9.85  | 14.090                 | 0.129        | 0.135 | 2.465    |
| 7   | Compound 9 | 10.33 | 10696.009              | 97.648       | 0.167 | 1675.245 |
| 8   | Peak8      | 10.55 | 24.288                 | 0.222        | 0.096 | 2.931    |
| 9   | Peak9      | 12.25 | 19.816                 | 0.181        | 0.208 | 1.980    |
| 10  | Peak10     | 15.91 | 8.071                  | 0.074        | 0.155 | 1.214    |
| 11  | Peak11     | 19.91 | 23.964                 | 0.219        | 0.189 | 3.117    |

|                         |                                                           |
|-------------------------|-----------------------------------------------------------|
| <b>Sampling Rate</b>    | 120.0017                                                  |
| <b>Injection Volume</b> | 5 uL                                                      |
| <b>Detector</b>         | UV (231 nm)                                               |
| <b>Mobile Phase A</b>   | Acetonitrile                                              |
| <b>Mobile Phase B</b>   | 10mM KH <sub>2</sub> PO <sub>4</sub> pH3HClO <sub>4</sub> |
| <b>Gradient</b>         | 99-39B (30 min)                                           |
| <b>Temperature</b>      | 25°C                                                      |
| <b>Column Name</b>      | Xbridge C18                                               |
| <b>Length</b>           | 15 cm                                                     |
| <b>Diameter</b>         | 0.46 cm                                                   |
| <b>Particle Size</b>    | 5 um                                                      |
| <b>Column Flow Rate</b> | 2 ml/min                                                  |

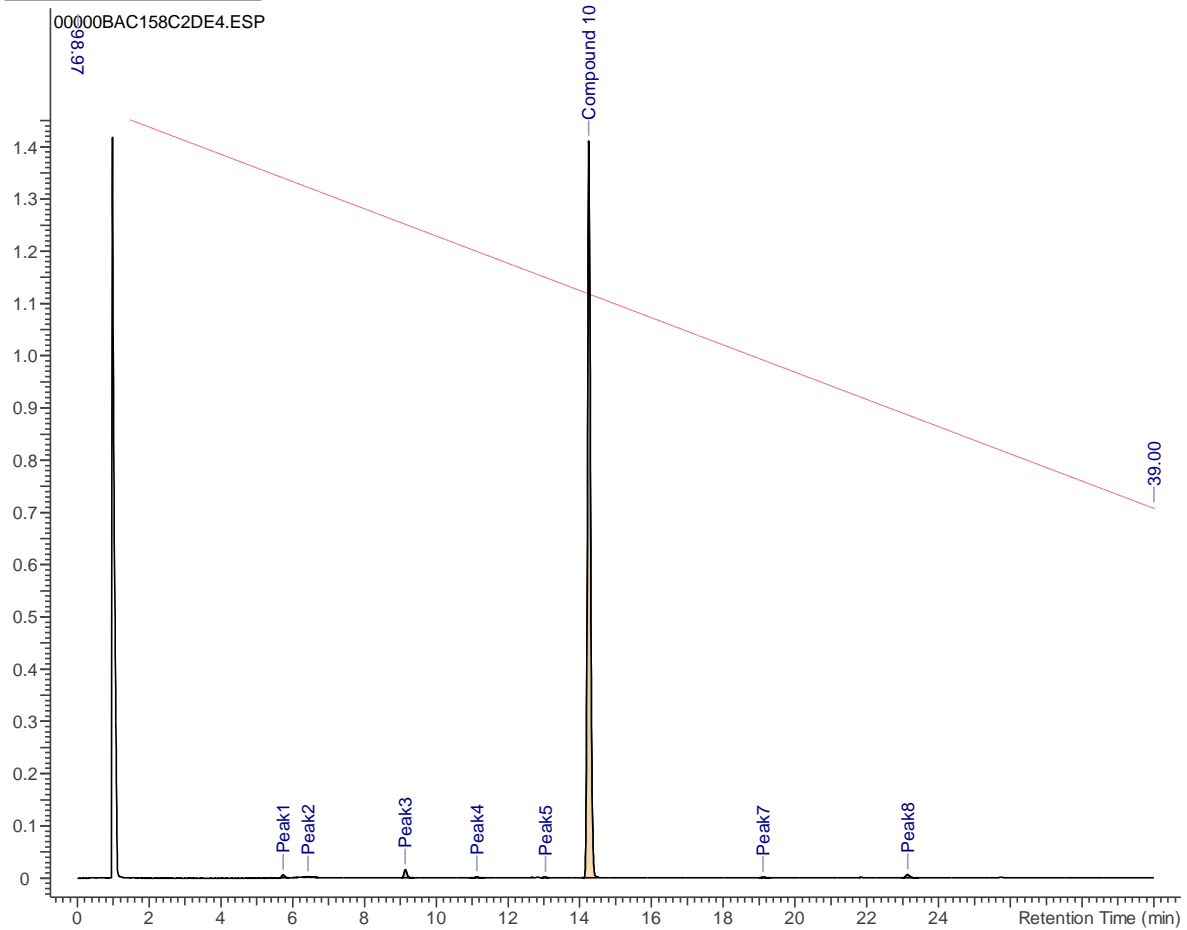

| No. | Name        | tR    | Peak Area (Y units*ms) | Area Percent | Width | Height   |
|-----|-------------|-------|------------------------|--------------|-------|----------|
| 1   | Peak1       | 5.73  | 30.350                 | 0.372        | 0.148 | 5.321    |
| 2   | Peak2       | 6.43  | 10.838                 | 0.133        | 0.152 | 1.519    |
| 3   | Peak3       | 9.14  | 87.484                 | 1.072        | 0.141 | 15.903   |
| 4   | Peak4       | 11.14 | 14.331                 | 0.176        | 0.136 | 2.515    |
| 5   | Peak5       | 13.04 | 6.350                  | 0.078        | 0.164 | 1.031    |
| 6   | Compound 10 | 14.25 | 7958.520               | 97.497       | 0.145 | 1410.702 |
| 7   | Peak7       | 19.11 | 9.705                  | 0.119        | 0.215 | 1.118    |
| 8   | Peak8       | 23.14 | 45.271                 | 0.555        | 0.177 | 6.291    |

|                         |                                            |
|-------------------------|--------------------------------------------|
| <b>Injection Volume</b> | 1 uL                                       |
| <b>Detector</b>         | UV (210 nm)                                |
| <b>Mobile Phase A</b>   | ACN                                        |
| <b>Mobile Phase B</b>   | water+0.01%NH <sub>4</sub> CO <sub>3</sub> |
| <b>Gradient</b>         | 95B (8min)                                 |
| <b>Temperature</b>      | 22°C                                       |
| <b>Column Name</b>      | Kinetex EVO C18                            |
| <b>Length</b>           | 5 cm                                       |
| <b>Diameter</b>         | 0.46 cm                                    |
| <b>Particle Size</b>    | 2.6 um                                     |
| <b>Column Flow Rate</b> | 1.5 ml/min                                 |

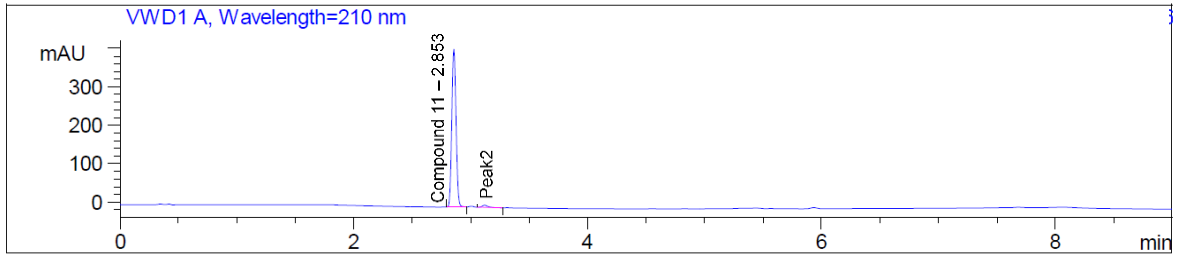

| #        | Meas. | Ret | Peak | Width | Area    | Response |
|----------|-------|-----|------|-------|---------|----------|
| Compd 11 | 2.853 | VV  |      | 0.040 | 1.047e3 | 97.488   |
| Peak2    | 3.116 | VV  |      | 0.059 | 26.985  | 2.512    |

Sampling Rate 120.002

Injection Volume 5 uL

Detector UV (246 nm)

Mobile Phase A ACN+0.01%TFA

Mobile Phase B water+0.01%TFA

Gradient 85-40B (30 min)

Temperature 25°C

Column Name Xbridge C18

Length 15 cm

Diameter 0.46 cm

Particle Size 5 um

Column Flow Rate 2 ml/min

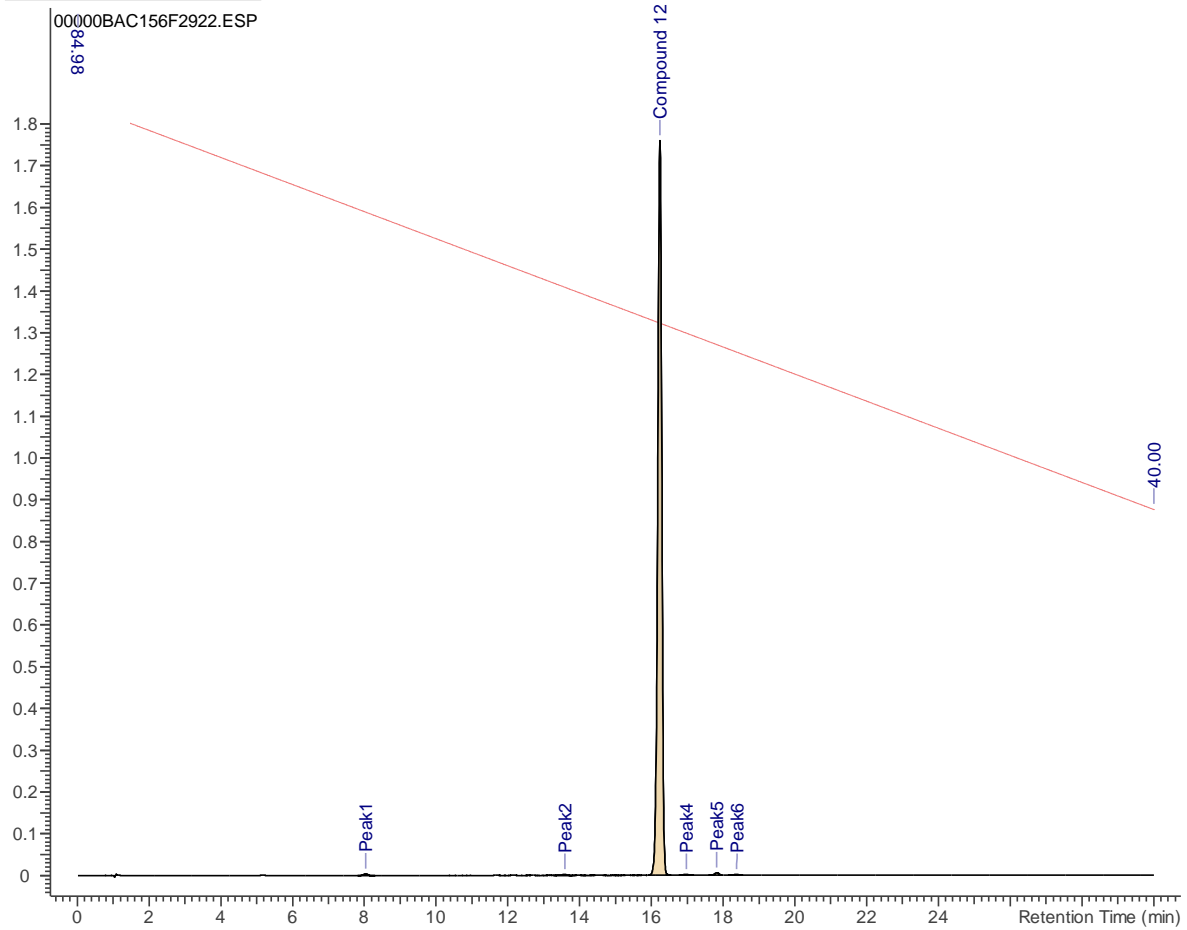

| No. | Name        | tR    | Peak Area (Y units*ms) | Area Percent | Width | Height   |
|-----|-------------|-------|------------------------|--------------|-------|----------|
| 1   | Peak1       | 8.04  | 27.763                 | 0.204        | 0.180 | 3.852    |
| 2   | Peak2       | 13.58 | 22.097                 | 0.162        | 0.208 | 2.472    |
| 3   | Compound 12 | 16.24 | 13464.981              | 99.001       | 0.199 | 1759.242 |
| 4   | Peak4       | 16.97 | 18.712                 | 0.138        | 0.244 | 1.868    |
| 5   | Peak5       | 17.82 | 49.314                 | 0.363        | 0.208 | 6.119    |
| 6   | Peak6       | 18.37 | 18.049                 | 0.133        | 0.208 | 2.083    |

|                         |                                                           |
|-------------------------|-----------------------------------------------------------|
| <b>Sampling Rate</b>    | 120.002                                                   |
| <b>Injection Volume</b> | 5 uL                                                      |
| <b>Detector</b>         | UV (222 nm)                                               |
| <b>Mobile Phase A</b>   | Acetonitrile                                              |
| <b>Mobile Phase B</b>   | 10mM KH <sub>2</sub> PO <sub>4</sub> pH3HClO <sub>4</sub> |
| <b>Gradient</b>         | 99-69B (30 min)                                           |
| <b>Temperature</b>      | 25°C                                                      |
| <b>Column Name</b>      | Xbridge C18                                               |
| <b>Length</b>           | 15 cm                                                     |
| <b>Diameter</b>         | 0.46 cm                                                   |
| <b>Particle Size</b>    | 5 um                                                      |
| <b>Column Flow Rate</b> | 2 ml/min                                                  |

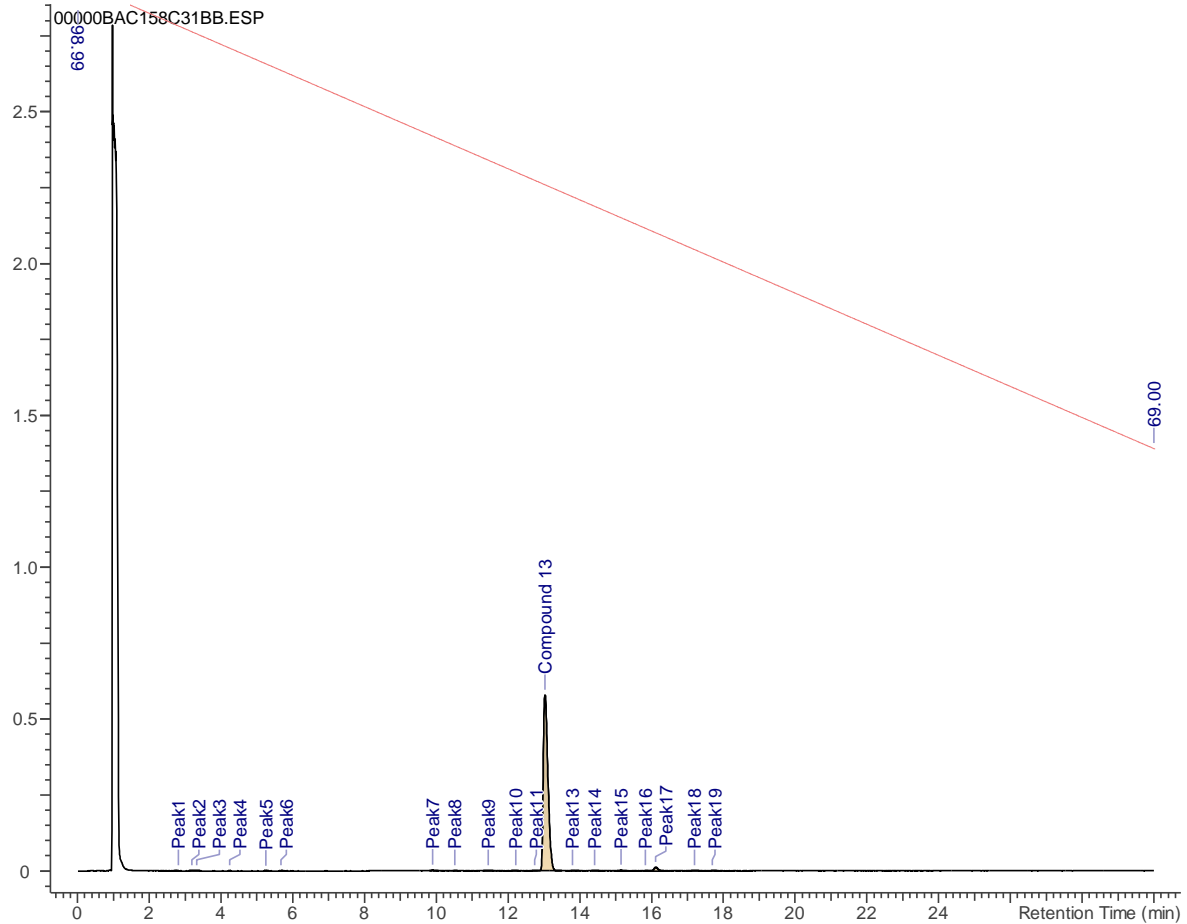

| No. | Name        | tR    | Peak Area (Y units*ms) | Area Percent | Width | Height        |
|-----|-------------|-------|------------------------|--------------|-------|---------------|
| 1   | Peak1       | 2.82  | 1.563                  | 0.029        | 0.150 | 347256.313    |
| 2   | Peak2       | 3.18  | 3.338                  | 0.063        | 0.100 | 790386.250    |
| 3   | Peak3       | 3.33  | 12.593                 | 0.237        | 0.233 | 1393638.000   |
| 4   | Peak4       | 4.24  | 1.047                  | 0.020        | 0.100 | 321880.438    |
| 5   | Peak5       | 5.24  | 2.517                  | 0.047        | 0.150 | 437450.469    |
| 6   | Peak6       | 5.68  | 1.751                  | 0.033        | 0.125 | 340323.375    |
| 7   | Peak7       | 9.89  | 12.124                 | 0.228        | 0.250 | 1911032.500   |
| 8   | Peak8       | 10.52 | 1.420                  | 0.027        | 0.108 | 313021.781    |
| 9   | Peak9       | 11.45 | 8.413                  | 0.159        | 0.283 | 1184674.250   |
| 10  | Peak10      | 12.21 | 2.475                  | 0.047        | 0.192 | 395336.813    |
| 11  | Peak11      | 12.75 | 3.137                  | 0.059        | 0.150 | 471904.531    |
| 12  | Compound 13 | 13.03 | 5134.103               | 96.739       | 0.683 | 578861248.000 |
| 13  | Peak13      | 13.79 | 2.667                  | 0.050        | 0.233 | 367421.063    |



|                  |                                                           |
|------------------|-----------------------------------------------------------|
| Sampling Rate    | 120.002                                                   |
| Injection Volume | 5 uL                                                      |
| Detector         | UV (217 nm)                                               |
| Mobile Phase A   | Acetonitrile                                              |
| Mobile Phase B   | 10mM KH <sub>2</sub> PO <sub>4</sub> pH3HClO <sub>4</sub> |
| Gradient         | 95-50B (30 min)                                           |
| Temperature      | 25°C                                                      |
| Column Name      | Xbridge C18                                               |
| Length           | 15 cm                                                     |
| Diameter         | 0.46 cm                                                   |
| Particle Size    | 5 um                                                      |
| Column Flow Rate | 2 ml/min                                                  |

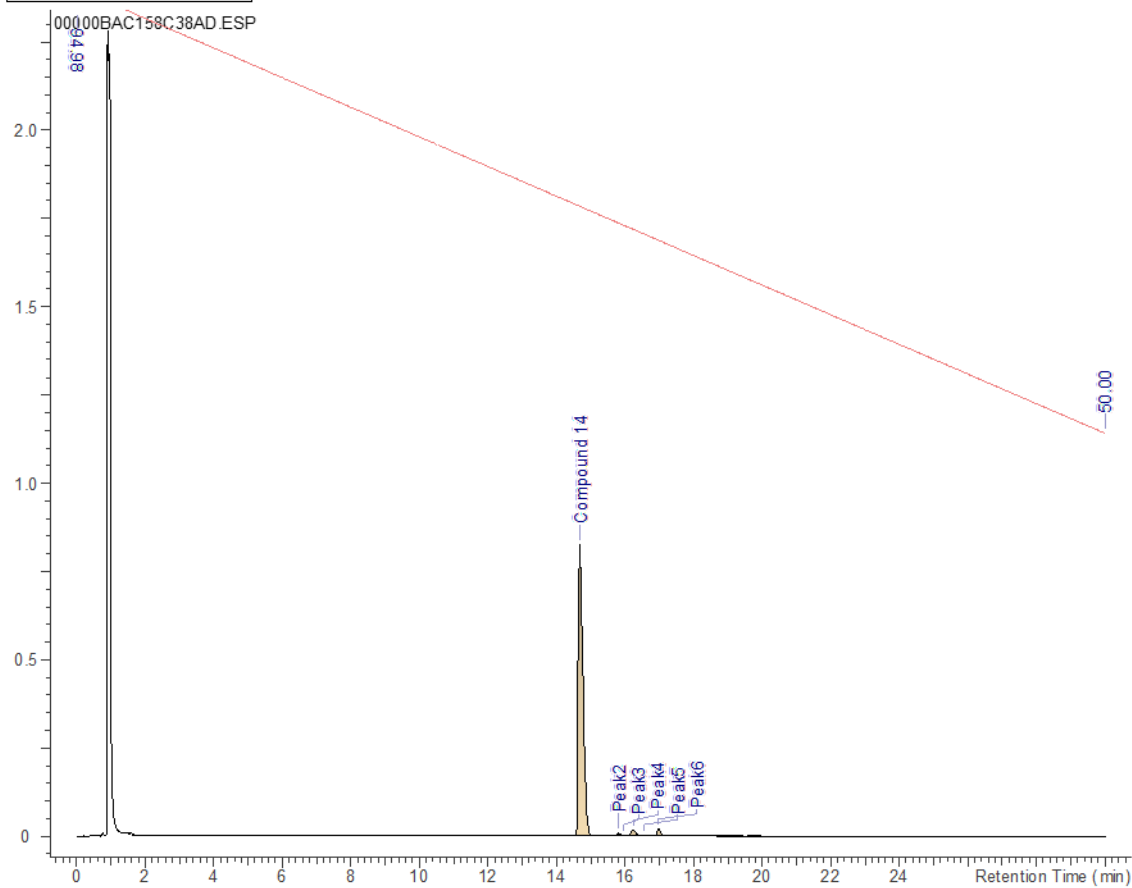

| No. | Name        | tR    | Peak Area (Y units*ms) | Area Percent | Width | Height  |
|-----|-------------|-------|------------------------|--------------|-------|---------|
| 1   | Compound 14 | 14.68 | 8035.843               | 95.133       | 0.264 | 824.394 |
| 2   | Peak2       | 15.82 | 58.945                 | 0.698        | 0.199 | 7.159   |
| 3   | Peak3       | 15.95 | 17.589                 | 0.208        | 0.126 | 2.826   |
| 4   | Peak4       | 16.24 | 163.902                | 1.940        | 0.256 | 16.797  |
| 5   | Peak5       | 16.55 | 20.933                 | 0.248        | 0.197 | 2.655   |
| 6   | Peak6       | 16.98 | 149.701                | 1.772        | 0.191 | 19.263  |

|                         |                 |
|-------------------------|-----------------|
| <b>Injection Volume</b> | 5 uL            |
| <b>Detector</b>         | UV (222 nm)     |
| <b>Mobile Phase A</b>   | ACN+0.01%TFA    |
| <b>Mobile Phase B</b>   | water+0.01%TFA  |
| <b>Gradient</b>         | 99-54B (30 min) |
| <b>Temperature</b>      | 25°C            |
| <b>Column Name</b>      | Xbridge C18     |
| <b>Length</b>           | 15 cm           |
| <b>Diameter</b>         | 0.46 cm         |
| <b>Particle Size</b>    | 5 um            |
| <b>Column Flow Rate</b> | 2 ml/min        |

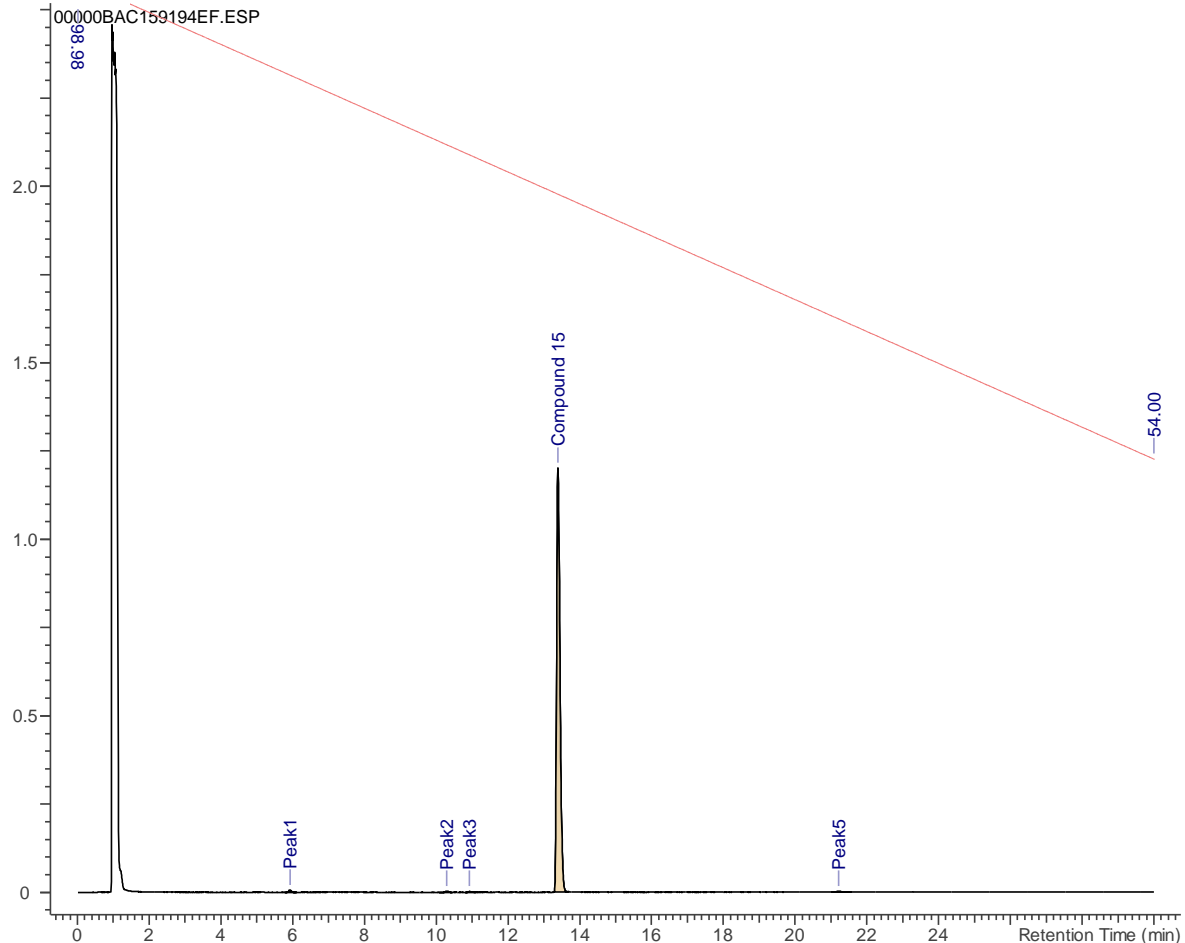

| No. | Name        | tR    | Peak Area (Y units*ms) | Area Percent | Width | Height   |
|-----|-------------|-------|------------------------|--------------|-------|----------|
| 1   | Peak1       | 5.92  | 31.841                 | 0.410        | 0.129 | 6.158    |
| 2   | Peak2       | 10.30 | 16.881                 | 0.217        | 0.134 | 2.886    |
| 3   | Peak3       | 10.93 | 12.970                 | 0.167        | 0.131 | 2.004    |
| 4   | Compound 15 | 13.40 | 7683.434               | 98.910       | 0.169 | 1200.746 |
| 5   | Peak5       | 21.21 | 22.943                 | 0.295        | 0.187 | 2.786    |

Sampling Rate 120.002

Injection Volume 5 uL

Detector UV (235 nm)

Mobile Phase A ACN+0.01%TFA

Mobile Phase B water+0.01%TFA

Gradient 90-45B (30 min)

Temperature 25°C

Column Name Xbridge C18

Length 15 cm

Diameter 0.46 cm

Particle Size 5 um

Column Flow Rate 2 ml/min

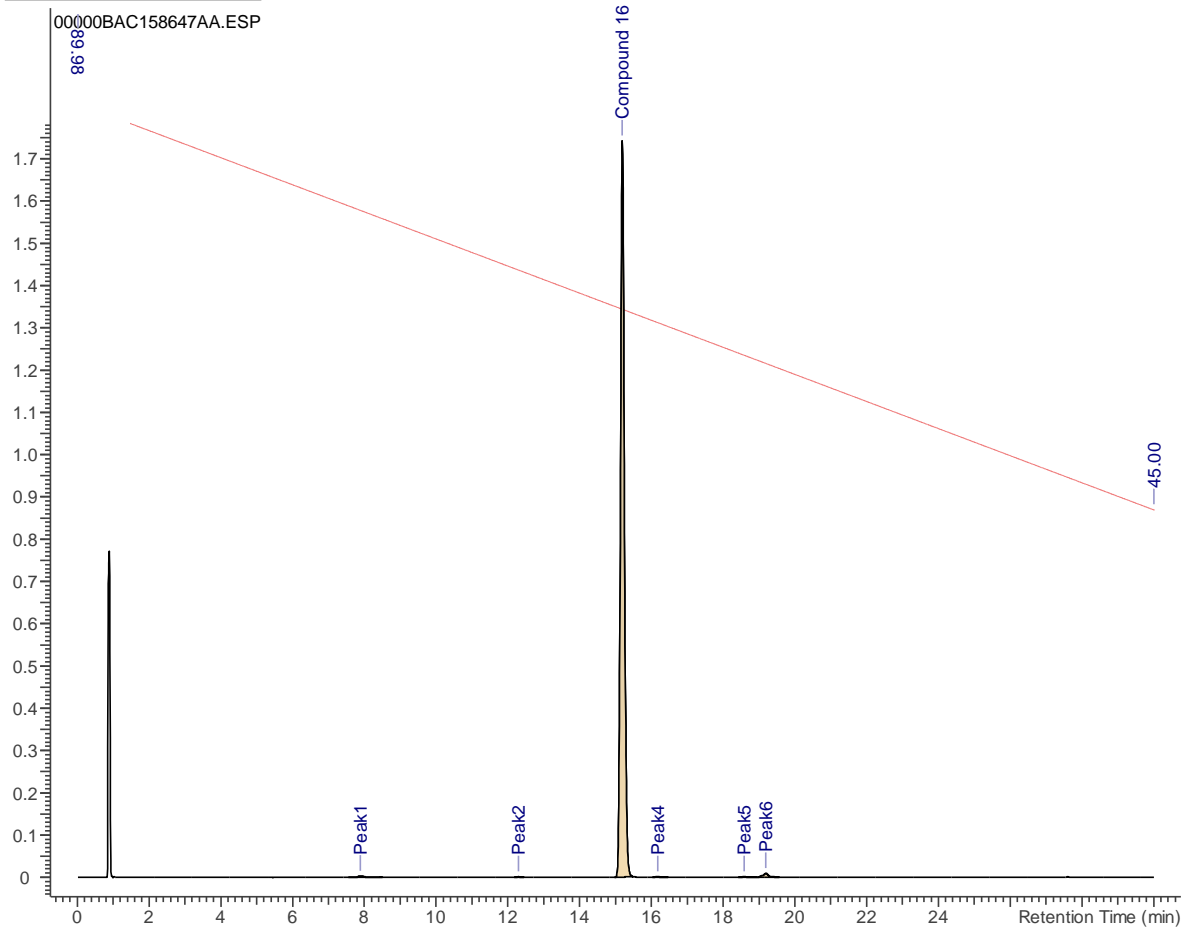

| No. | Name        | tR    | Peak Area (Y units*ms) | Area Percent | Width | Height   |
|-----|-------------|-------|------------------------|--------------|-------|----------|
| 1   | Peak1       | 7.88  | 41.542                 | 0.324        | 0.310 | 3.322    |
| 2   | Peak2       | 12.29 | 7.573                  | 0.059        | 0.195 | 1.062    |
| 3   | Compound 16 | 15.19 | 12659.291              | 98.652       | 0.187 | 1741.617 |
| 4   | Peak4       | 16.17 | 12.063                 | 0.094        | 0.198 | 1.237    |
| 5   | Peak5       | 18.59 | 11.435                 | 0.089        | 0.205 | 1.245    |
| 6   | Peak6       | 19.19 | 100.305                | 0.782        | 0.240 | 9.075    |

|                         |                 |
|-------------------------|-----------------|
| <b>Injection Volume</b> | 5 uL            |
| <b>Detector</b>         | UV (234 nm)     |
| <b>Mobile Phase A</b>   | ACN+0.01%TFA    |
| <b>Mobile Phase B</b>   | water+0.01%TFA  |
| <b>Gradient</b>         | 99-69B (30 min) |
| <b>Temperature</b>      | 22°C            |
| <b>Column Name</b>      | Xbridge C18     |
| <b>Length</b>           | 15 cm           |
| <b>Diameter</b>         | 0.46 cm         |
| <b>Particle Size</b>    | 5 um            |
| <b>Column Flow Rate</b> | 2ml/min         |

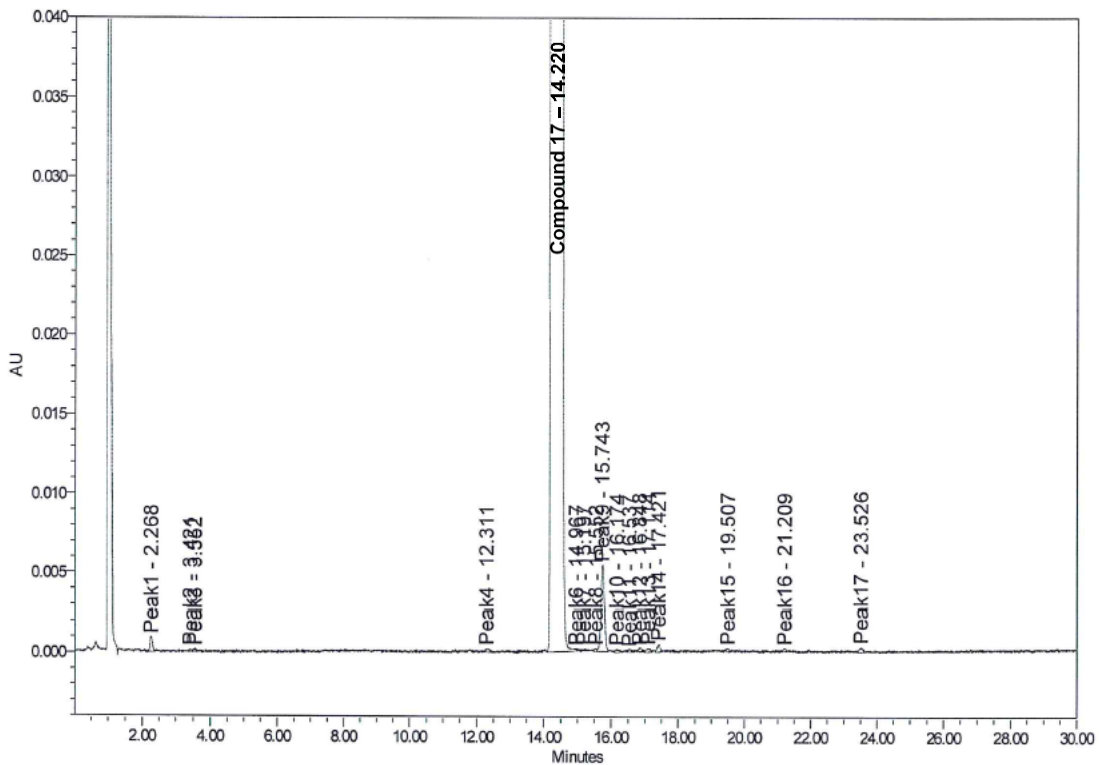

Peak Results

|    | Peak Name | RT     | Area (μV*sec) | % Area | RT Ratio |
|----|-----------|--------|---------------|--------|----------|
| 1  | Peak1     | 2.268  | 4949          | 0.077  | 0.159    |
| 2  | Peak2     | 3.421  | 623           | 0.010  | 0.241    |
| 3  | Peak3     | 3.562  | 1134          | 0.018  | 0.250    |
| 4  | Peak4     | 12.311 | 1912          | 0.030  | 0.865    |
| 5  | Compd17   | 14.220 | 6401174       | 99.041 |          |
| 6  | Peak6     | 14.967 | 542           | 0.008  | 1.053    |
| 7  | Peak7     | 15.197 | 669           | 0.010  | 1.069    |
| 8  | Peak8     | 15.552 | 792           | 0.012  | 1.094    |
| 9  | Peak9     | 15.743 | 38570         | 0.597  | 1.107    |
| 10 | Peak10    | 16.174 | 1154          | 0.018  | 1.137    |
| 11 | Peak11    | 16.537 | 1073          | 0.017  | 1.163    |
| 12 | Peak12    | 16.848 | 1718          | 0.027  | 1.185    |

|    | Peak Name | RT     | Area (μV*sec) | % Area | RT Ratio |
|----|-----------|--------|---------------|--------|----------|
| 13 | Peak13    | 17.114 | 1805          | 0.028  | 1.204    |
| 14 | Peak14    | 17.421 | 2747          | 0.043  | 1.225    |
| 15 | Peak15    | 19.507 | 973           | 0.015  | 1.372    |
| 16 | Peak16    | 21.209 | 1021          | 0.016  | 1.462    |
| 17 | Peak17    | 23.526 | 2302          | 0.036  | 1.654    |

Sampling Rate 120.0017

Injection Volume 5 uL

Detector UV (246 nm)

Mobile Phase A ACN+0.01%TFA

Mobile Phase B water+0.01%TFA

Gradient 75-30B (30 min)

Temperature 25°C

Column Name Xbridge C18

Length 15 cm

Diameter 0.46 cm

Particle Size 5 um

Column Flow Rate 2 ml/min

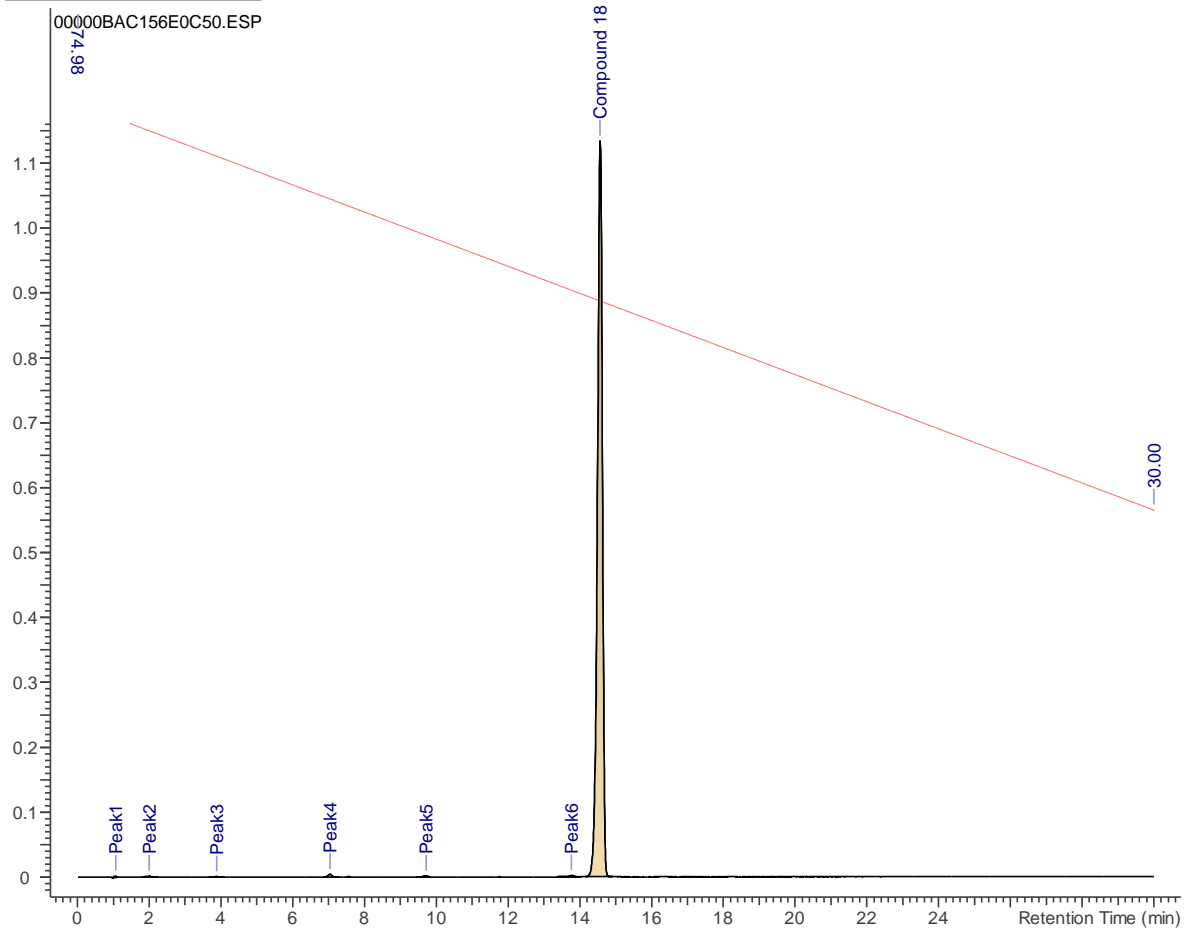

| No. | Name        | tR    | Peak Area (Y units*ms) | Area Percent | Width | Height   |
|-----|-------------|-------|------------------------|--------------|-------|----------|
| 1   | Peak1       | 1.07  | 9.980                  | 0.092        | 0.152 | 1.896    |
| 2   | Peak2       | 2.00  | 13.836                 | 0.128        | 0.157 | 1.654    |
| 3   | Peak3       | 3.88  | 6.682                  | 0.062        | 0.139 | 1.014    |
| 4   | Peak4       | 7.04  | 33.129                 | 0.307        | 0.171 | 4.682    |
| 5   | Peak5       | 9.71  | 14.613                 | 0.135        | 0.196 | 1.879    |
| 6   | Peak6       | 13.77 | 26.458                 | 0.245        | 0.262 | 2.073    |
| 7   | Compound 18 | 14.57 | 10693.979              | 99.030       | 0.244 | 1133.489 |

# <sup>1</sup>H NMR and <sup>13</sup>C NMR spectra of final compounds

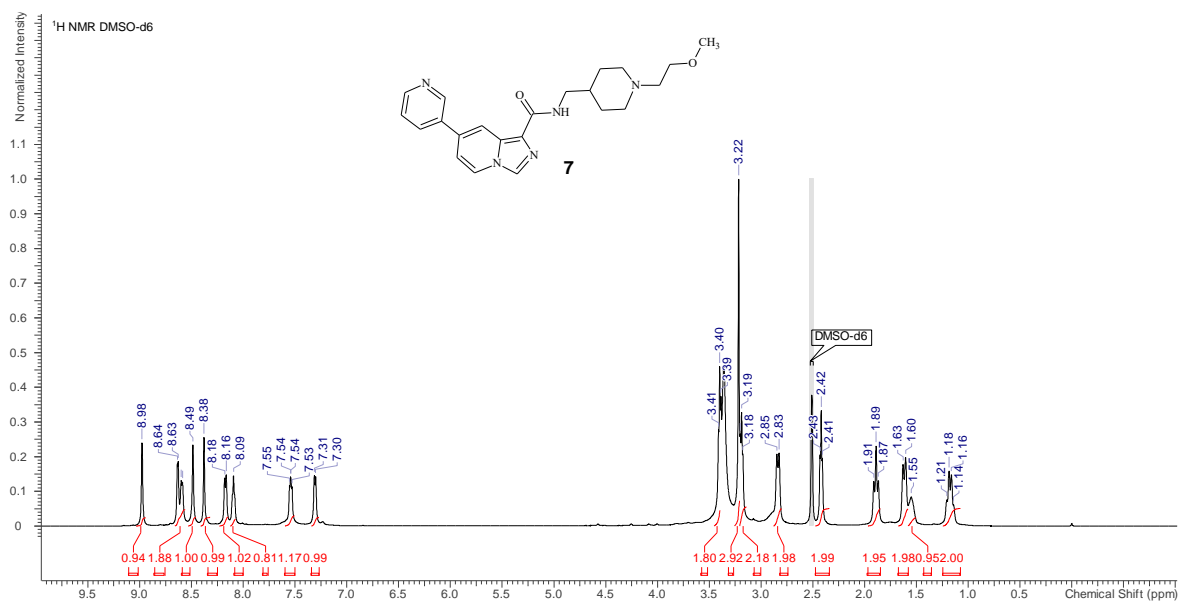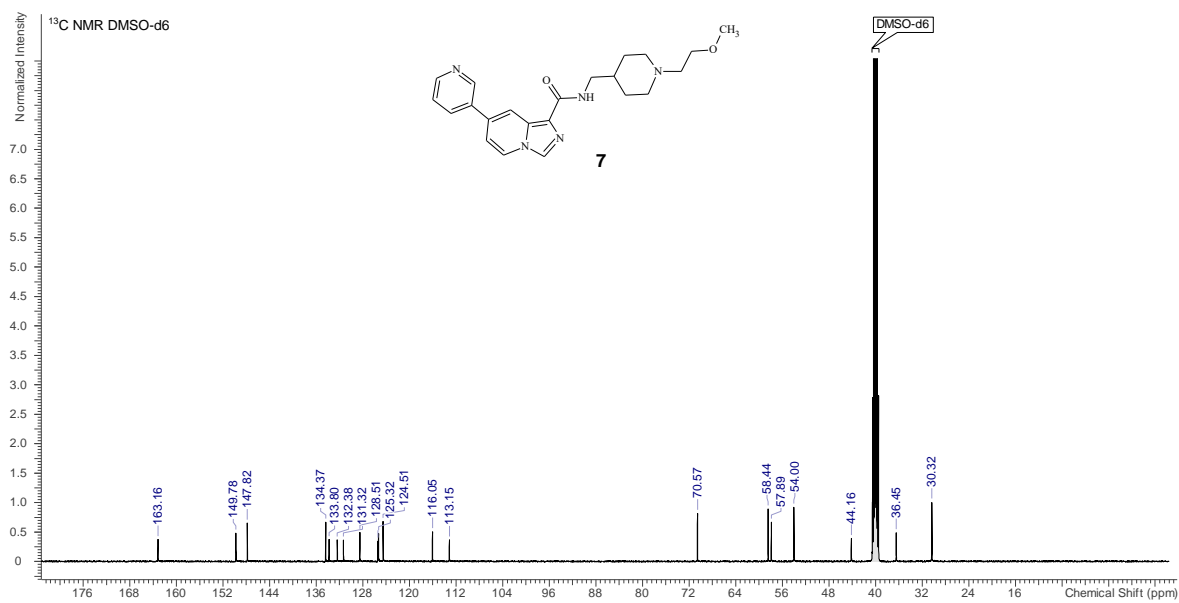

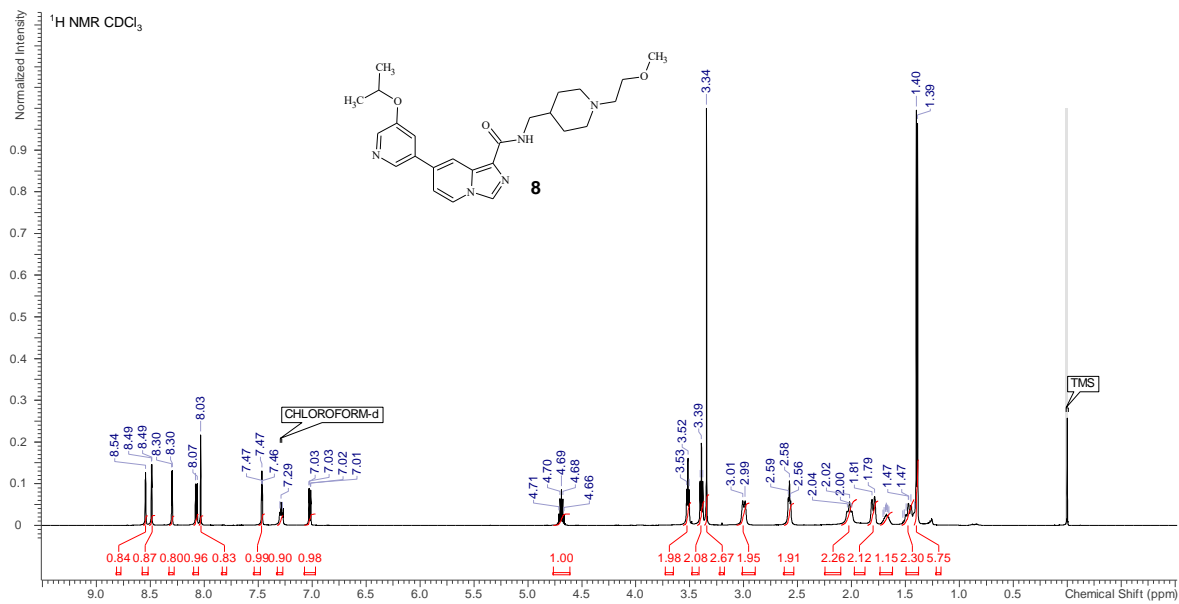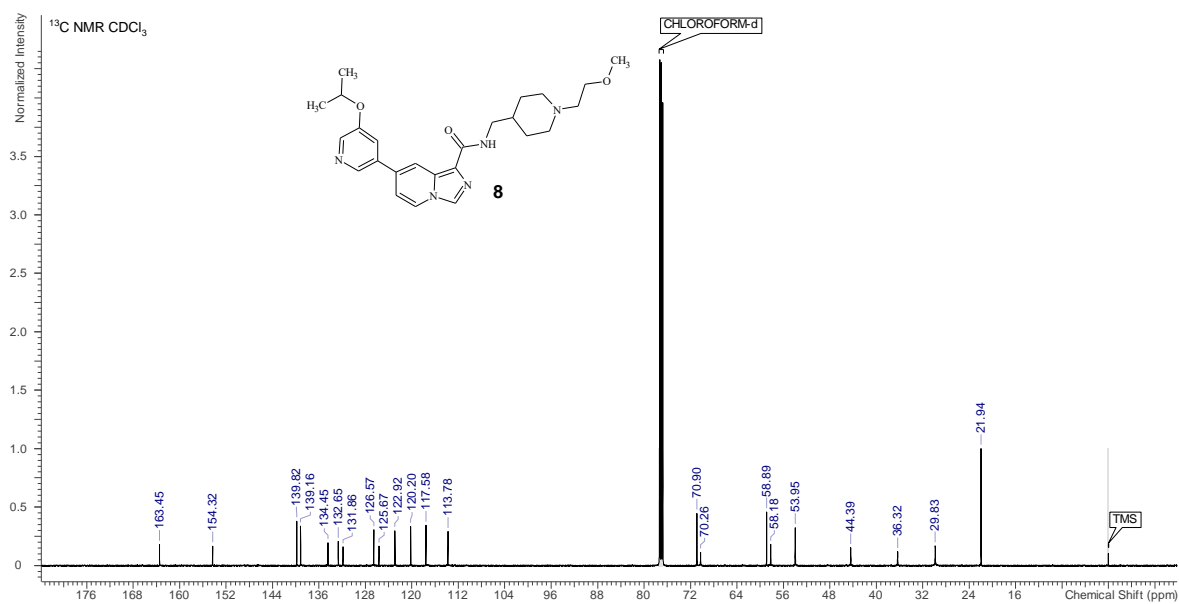

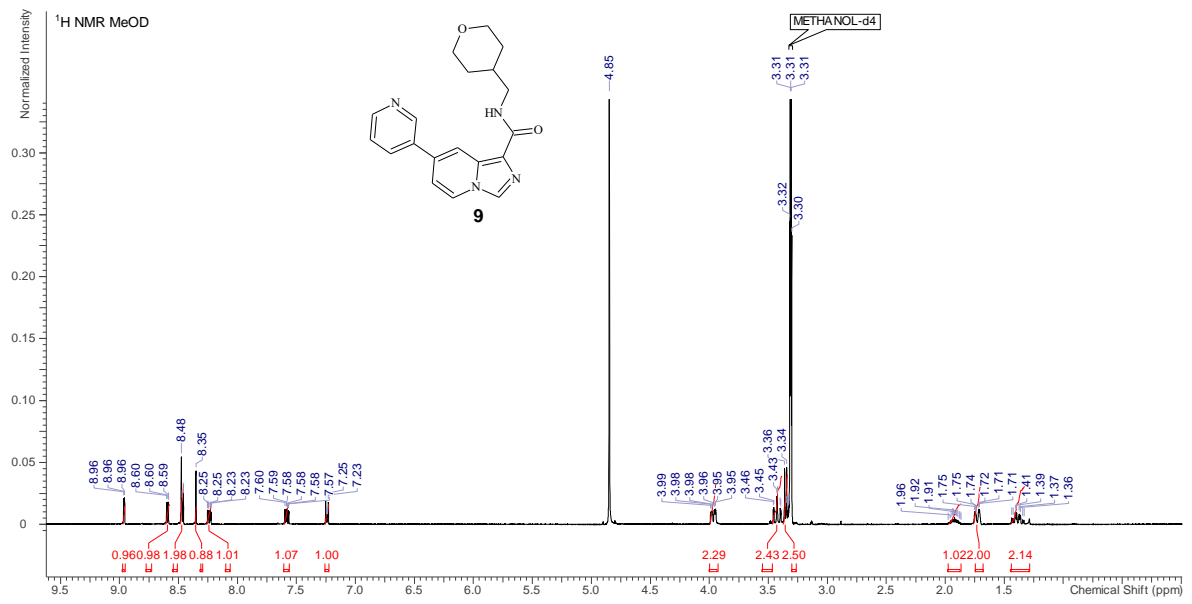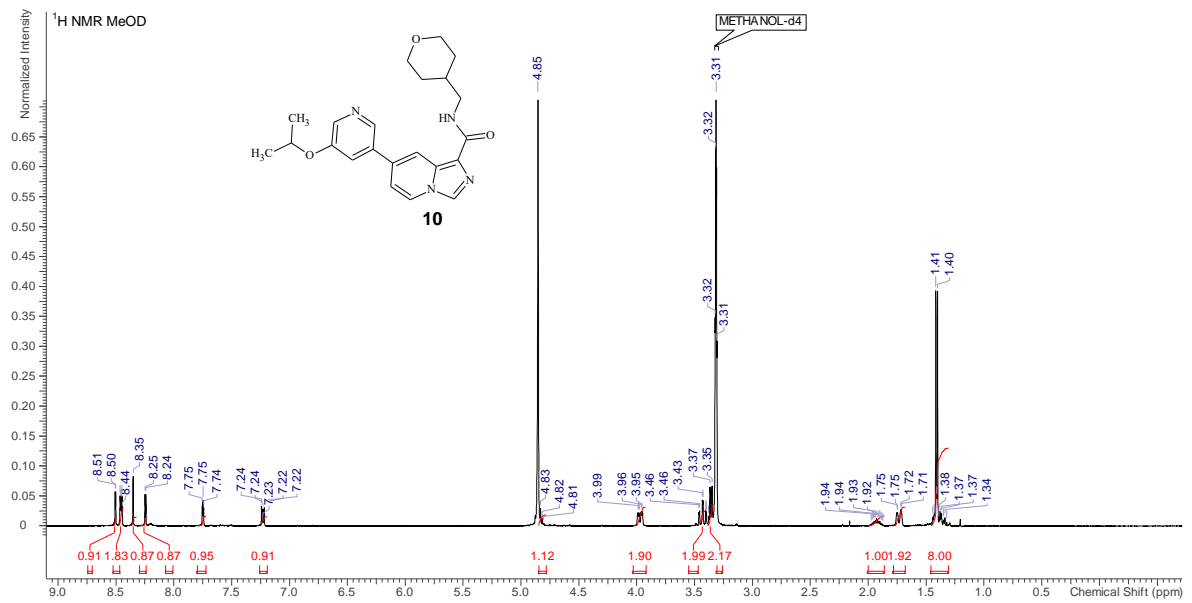



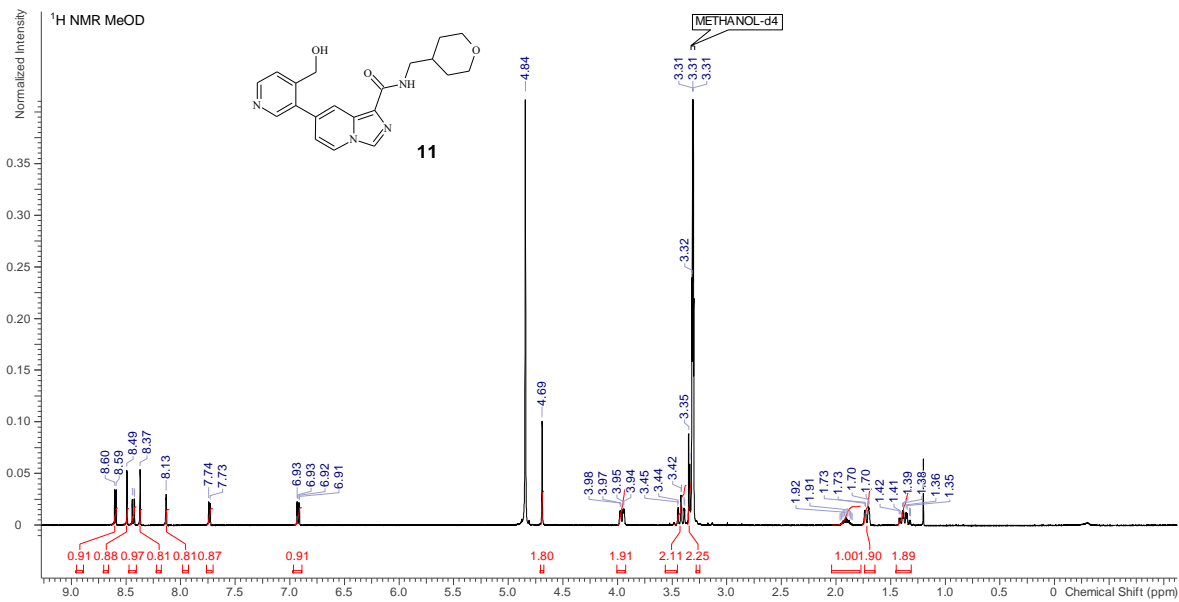

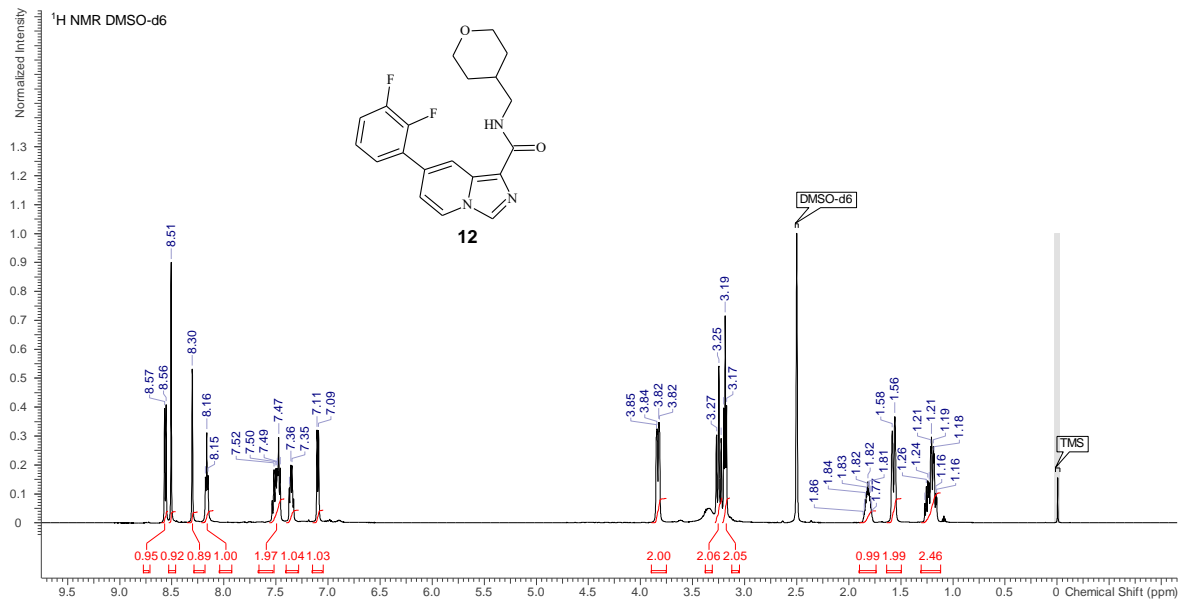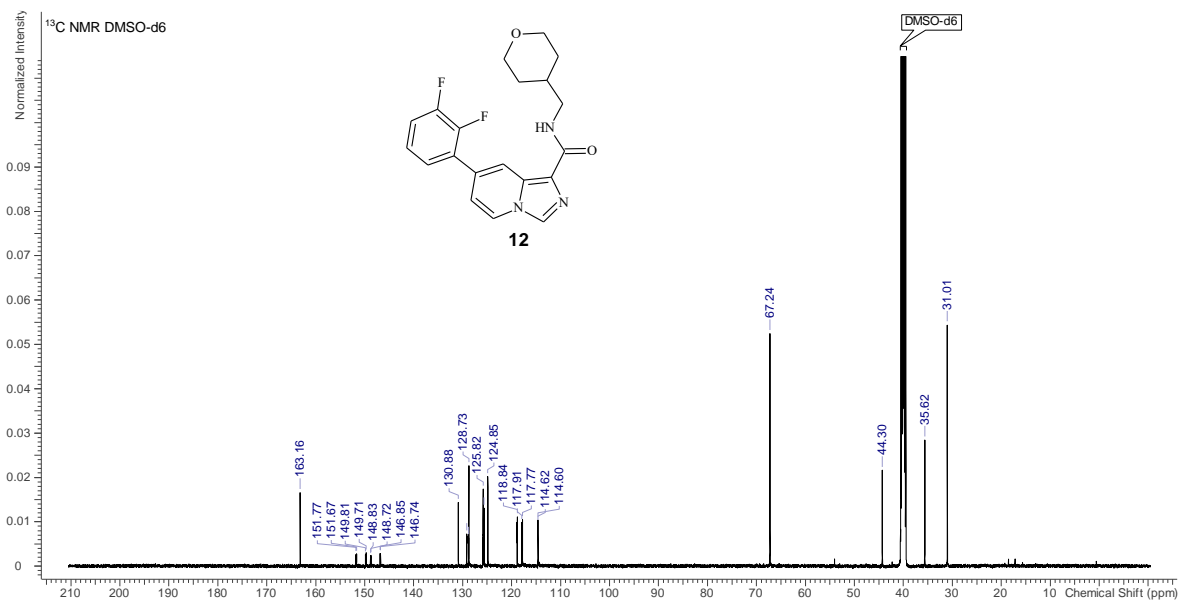

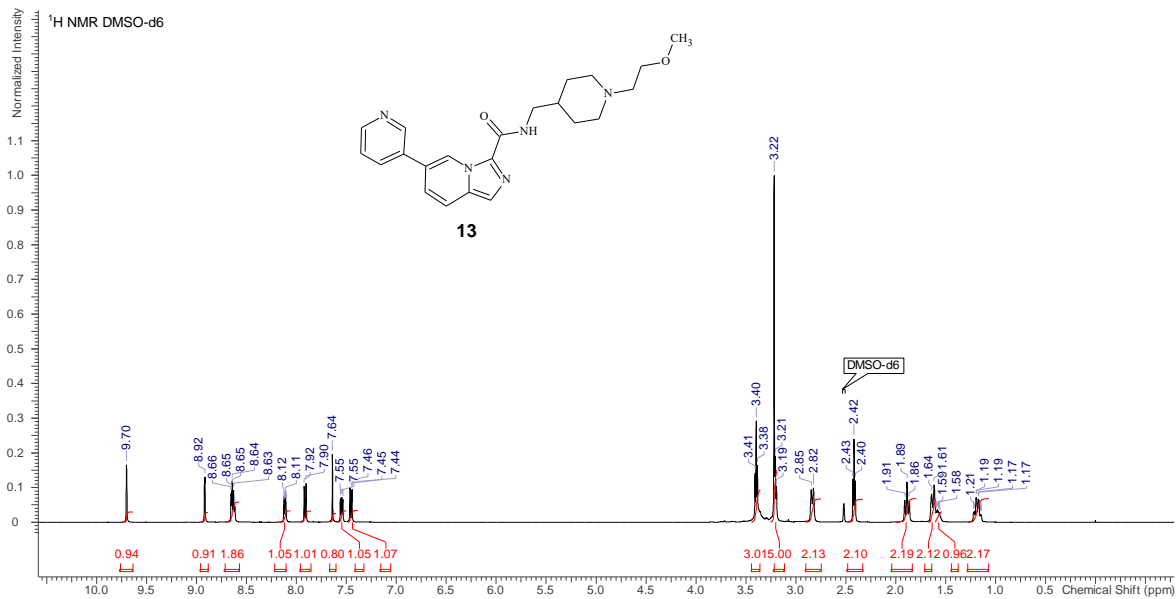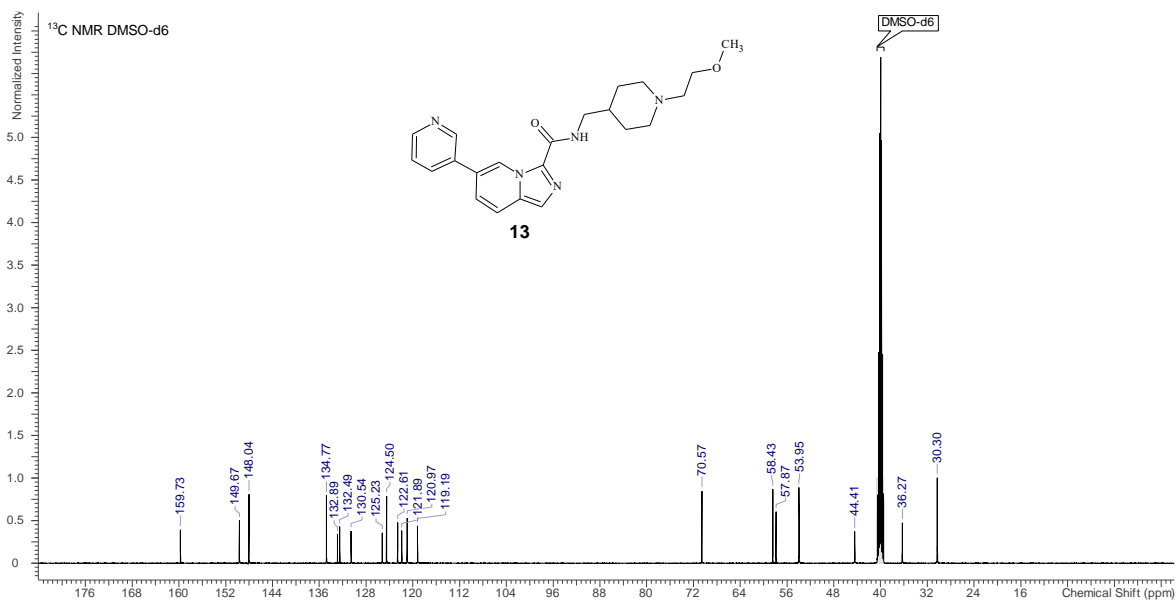

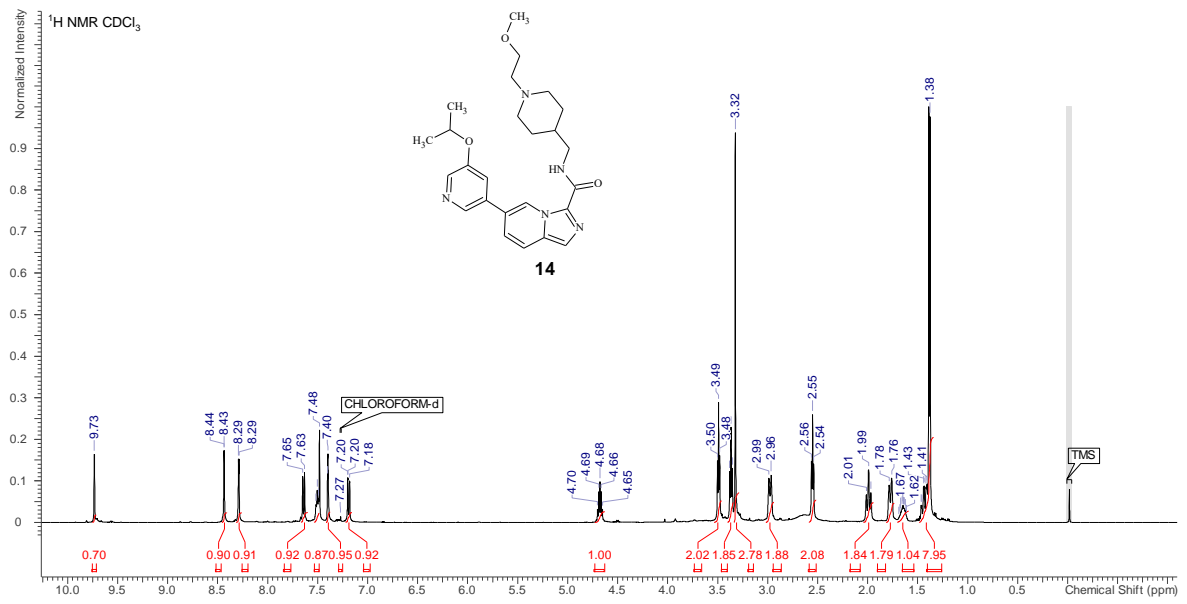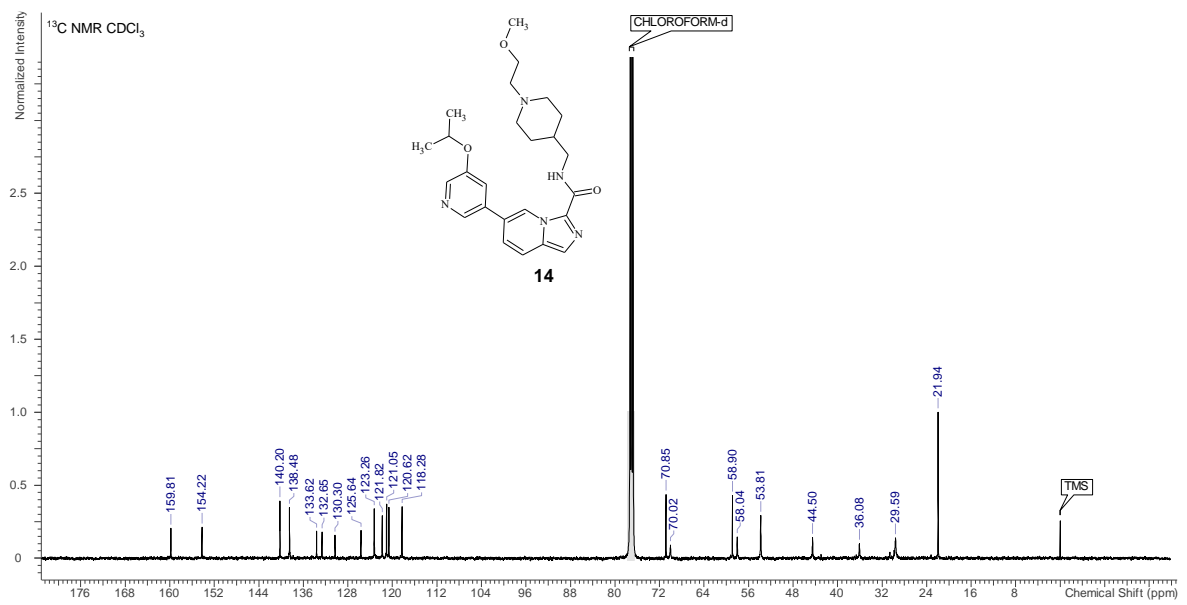

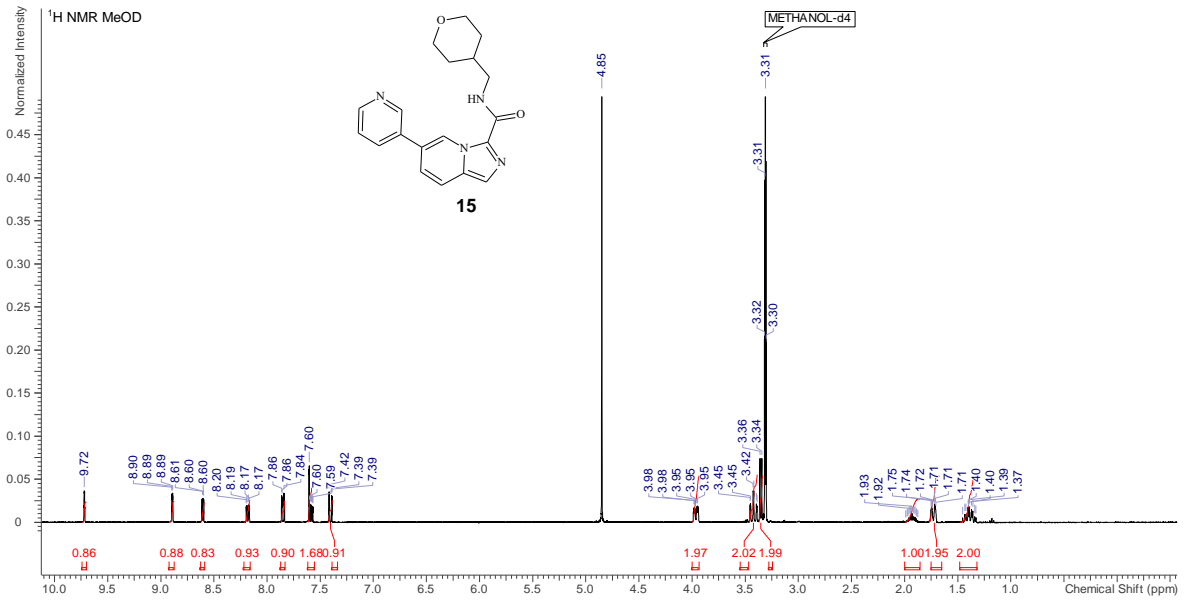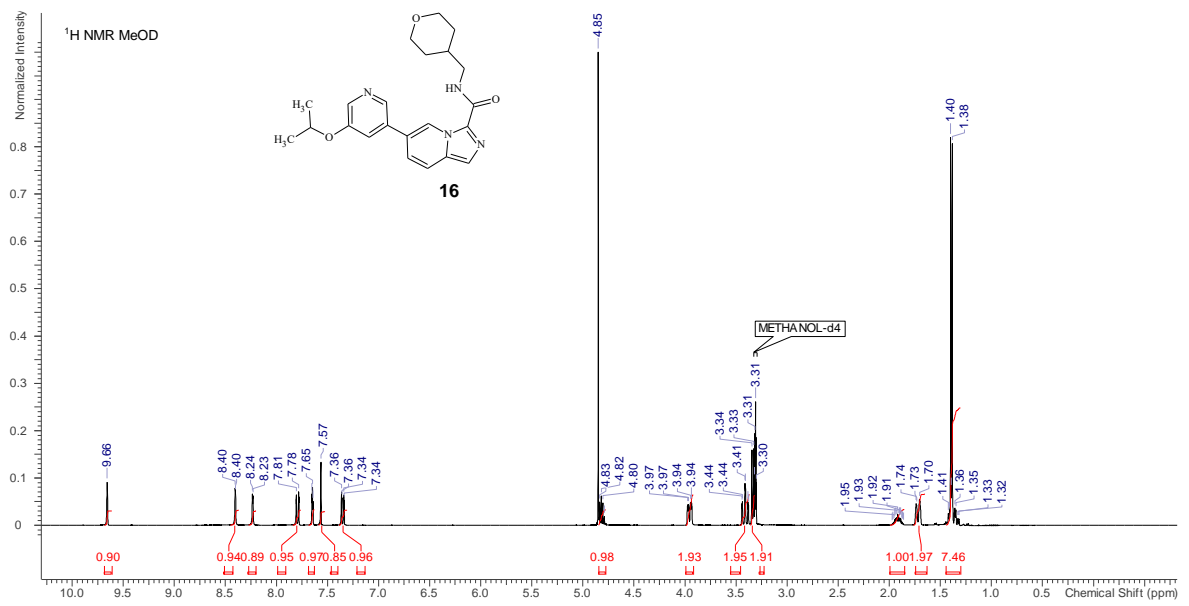

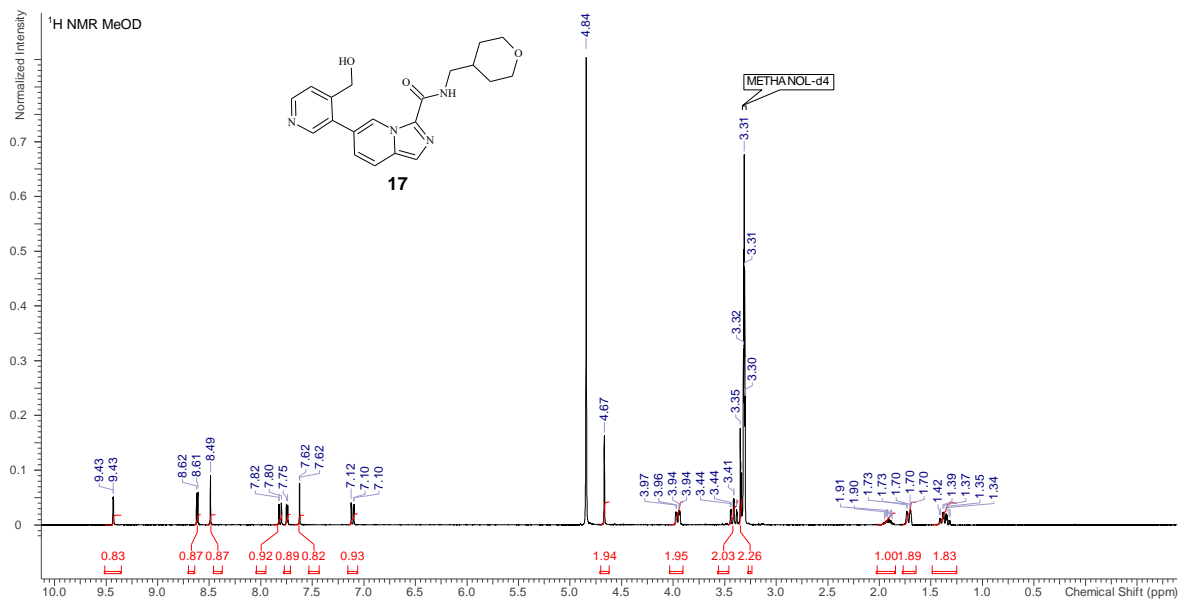

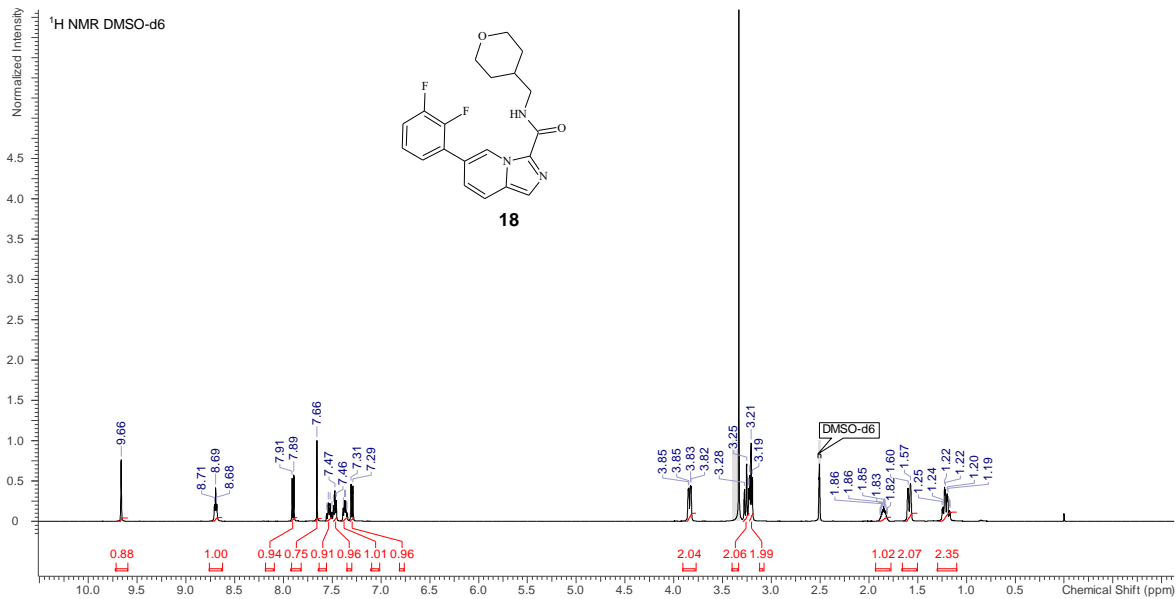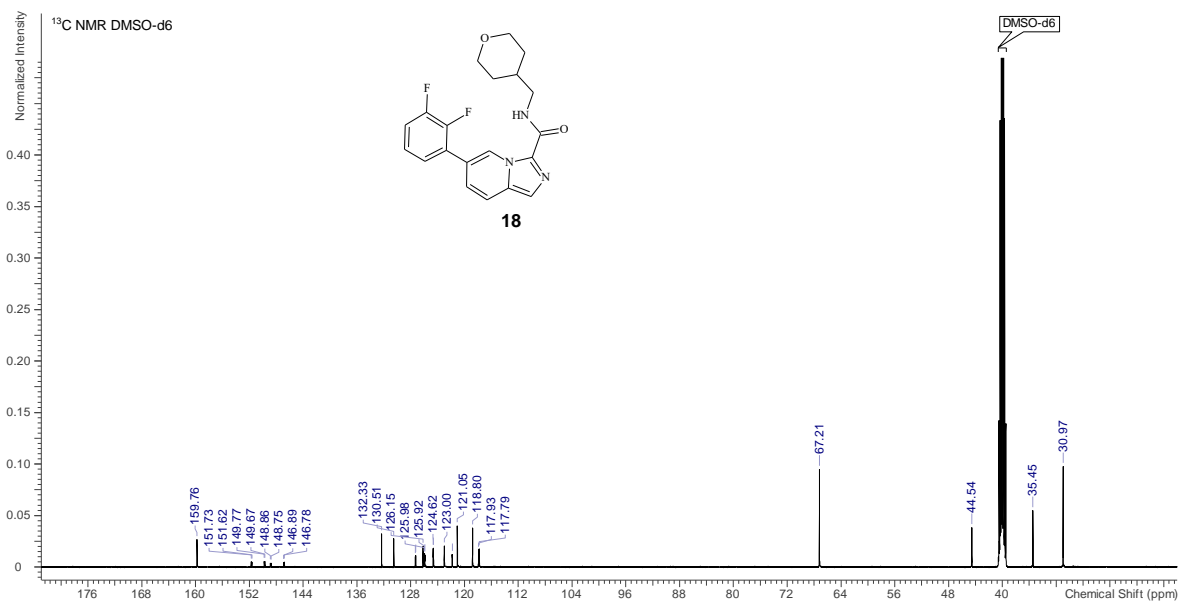

## 2D NMR spectra of compound 2

### $^1\text{H}$ - $^1\text{H}$ COSY

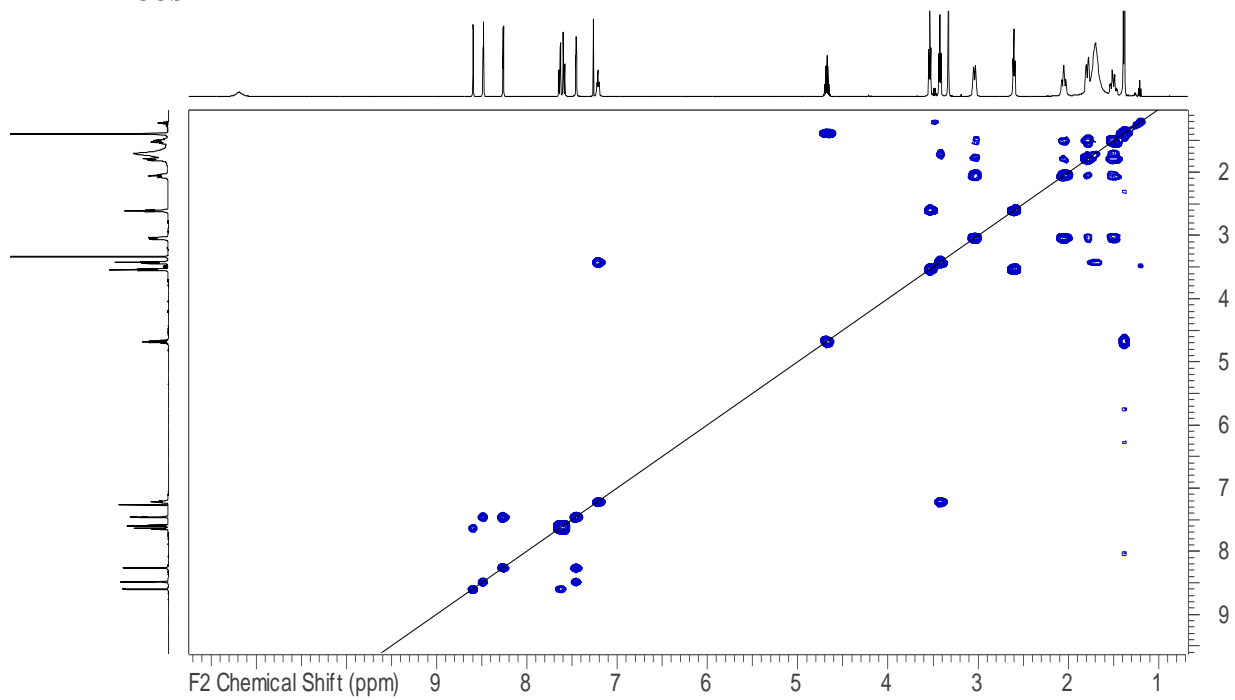

### $^1\text{H}$ - $^1\text{H}$ NOESY

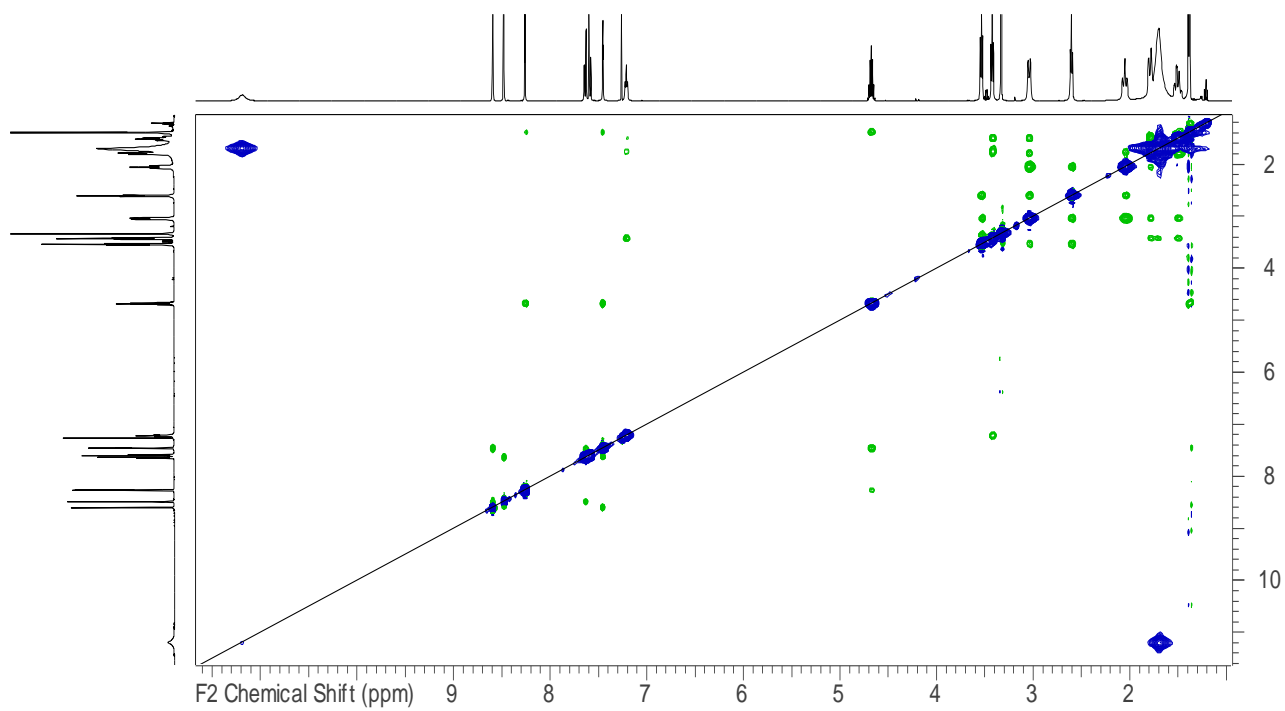



**$^1\text{H}$ - $^{13}\text{C}$  HSQC-DEPT**

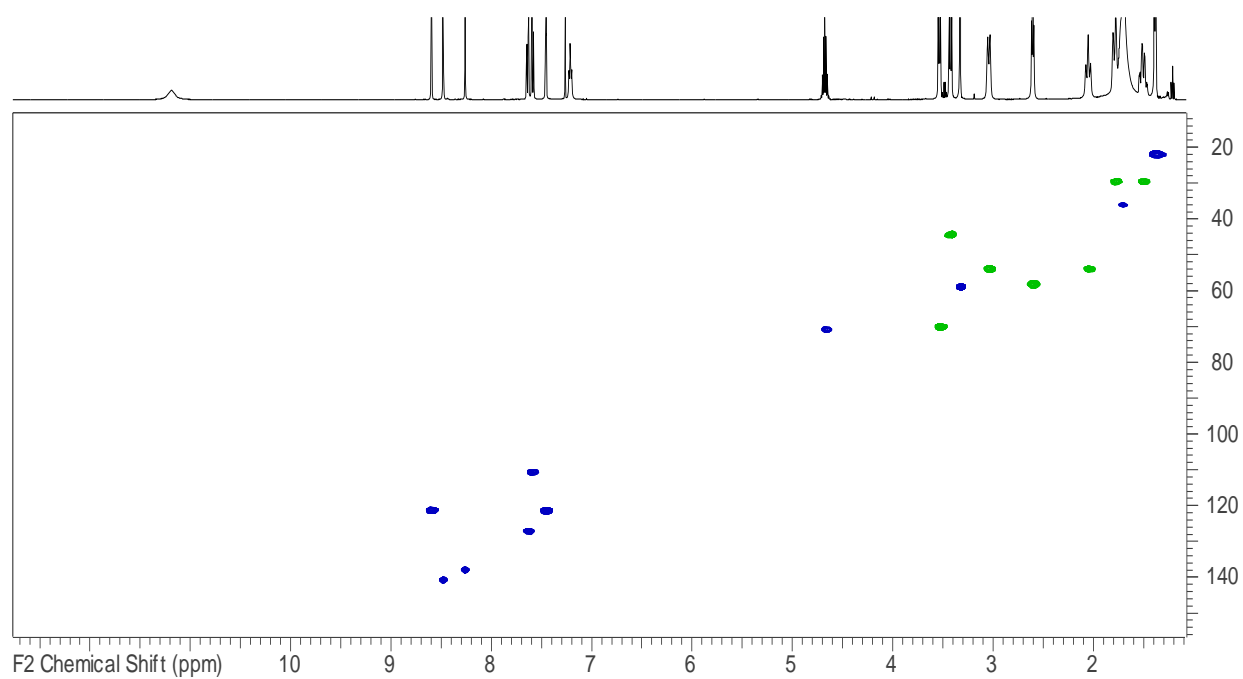

**$^1\text{H}$ - $^{13}\text{C}$  HMBC**

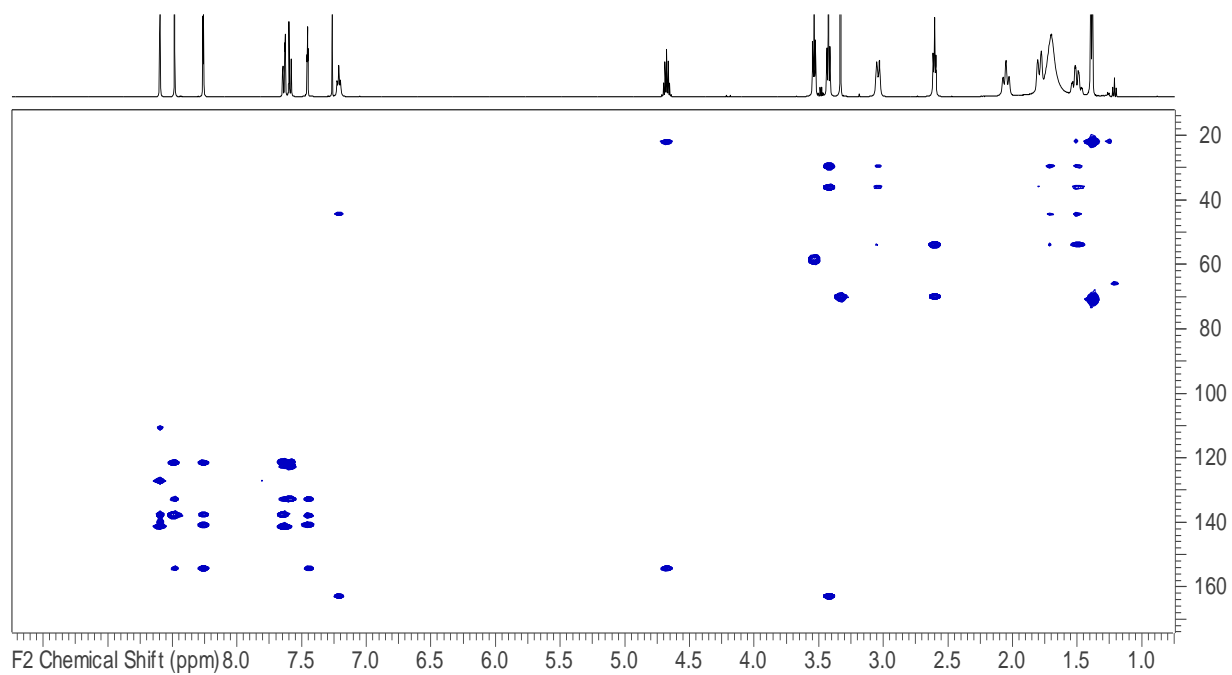

## 2D NMR spectra of compound 8

### $^1\text{H}$ - $^1\text{H}$ COSY

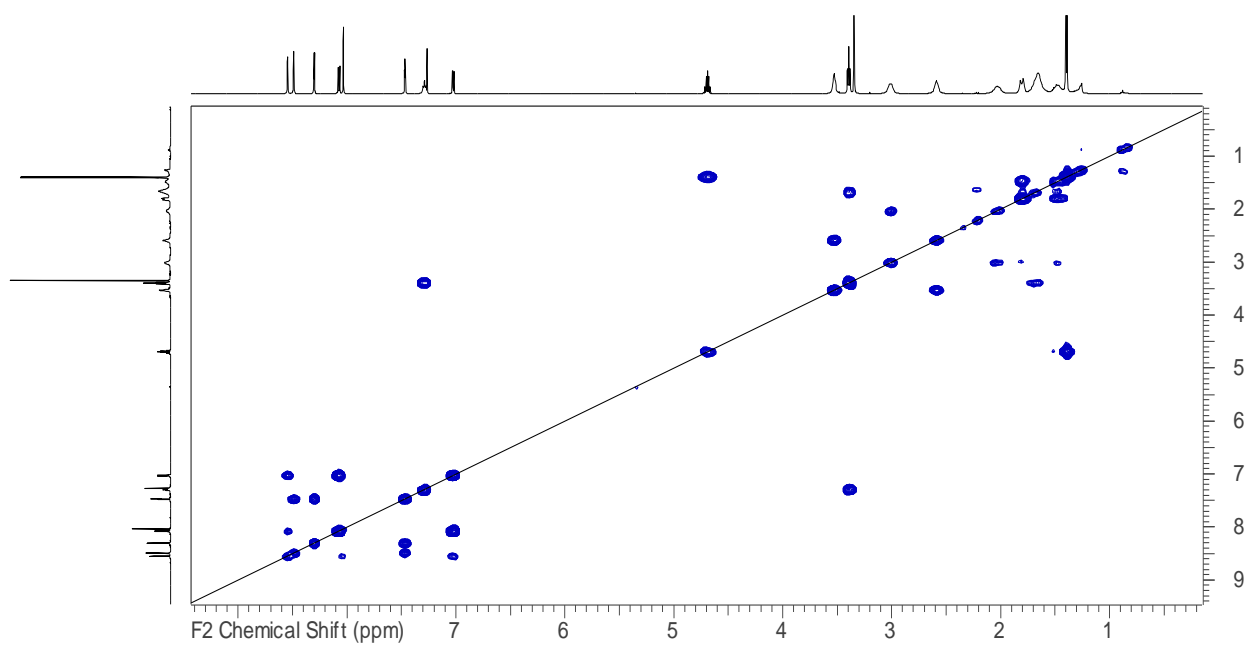

### $^1\text{H}$ - $^1\text{H}$ NOESY

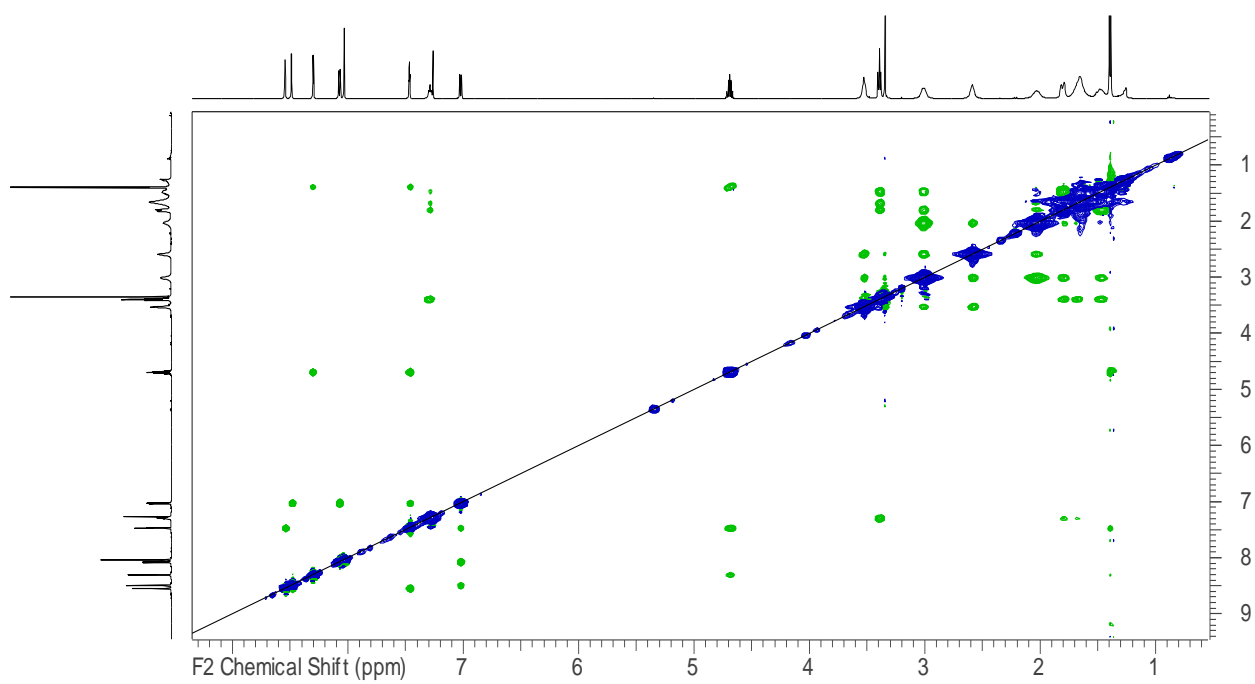

**$^1\text{H}$ - $^{13}\text{C}$  HSQC-DEPT**

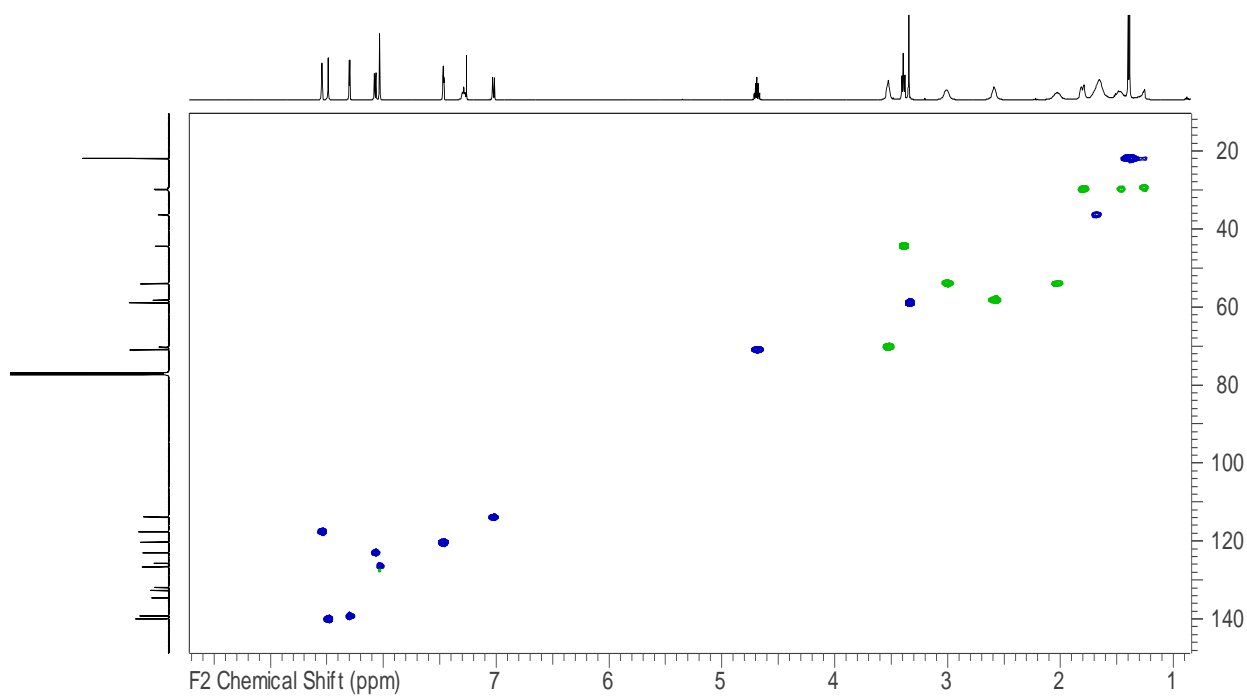

**$^1\text{H}$ - $^{13}\text{C}$  HMBC**

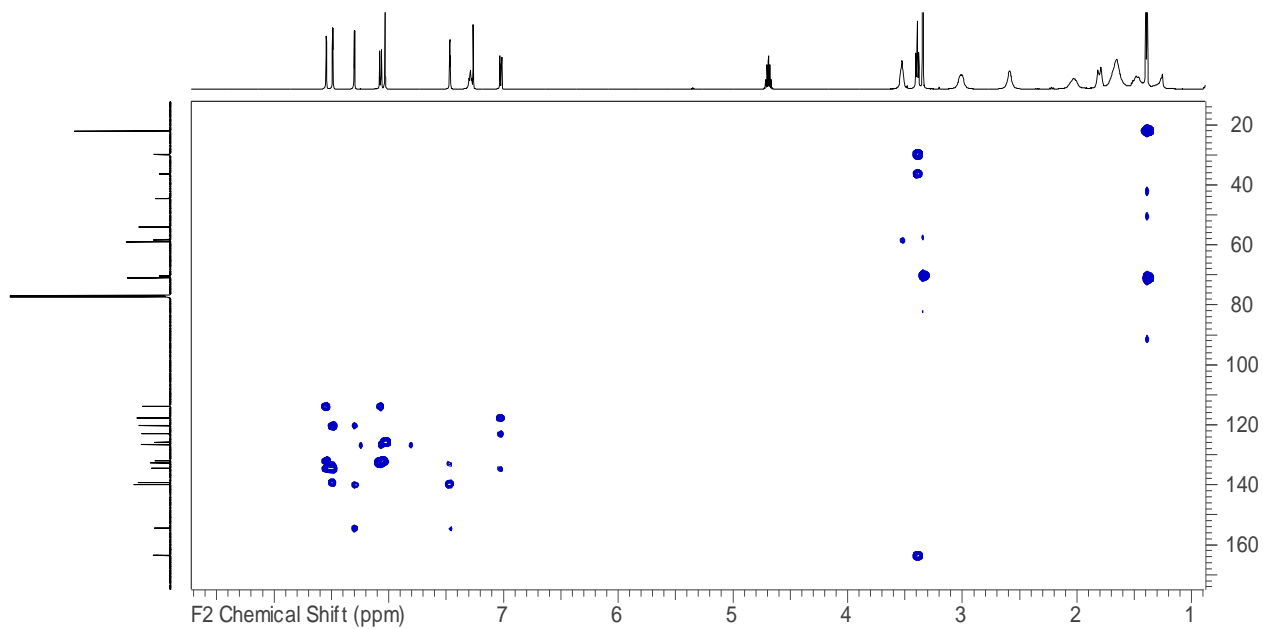

## 2D NMR spectra of compound 14

### $^1\text{H}$ - $^1\text{H}$ COSY

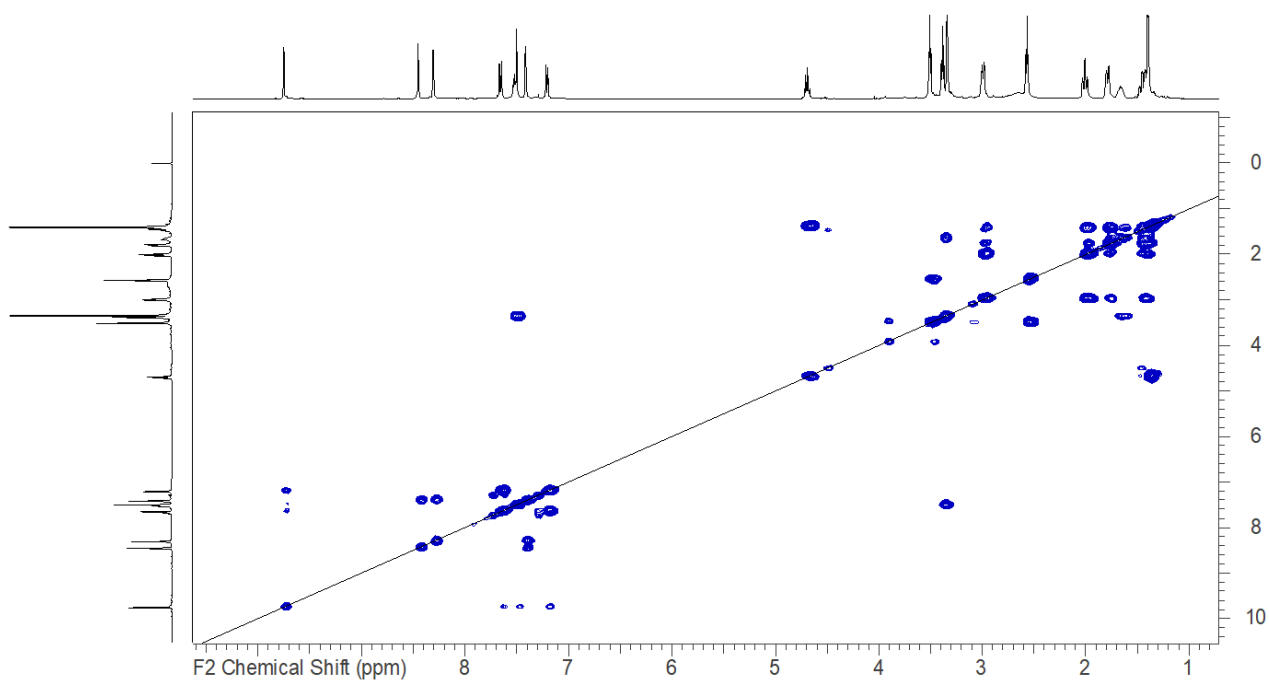

### $^1\text{H}$ - $^1\text{H}$ NOESY

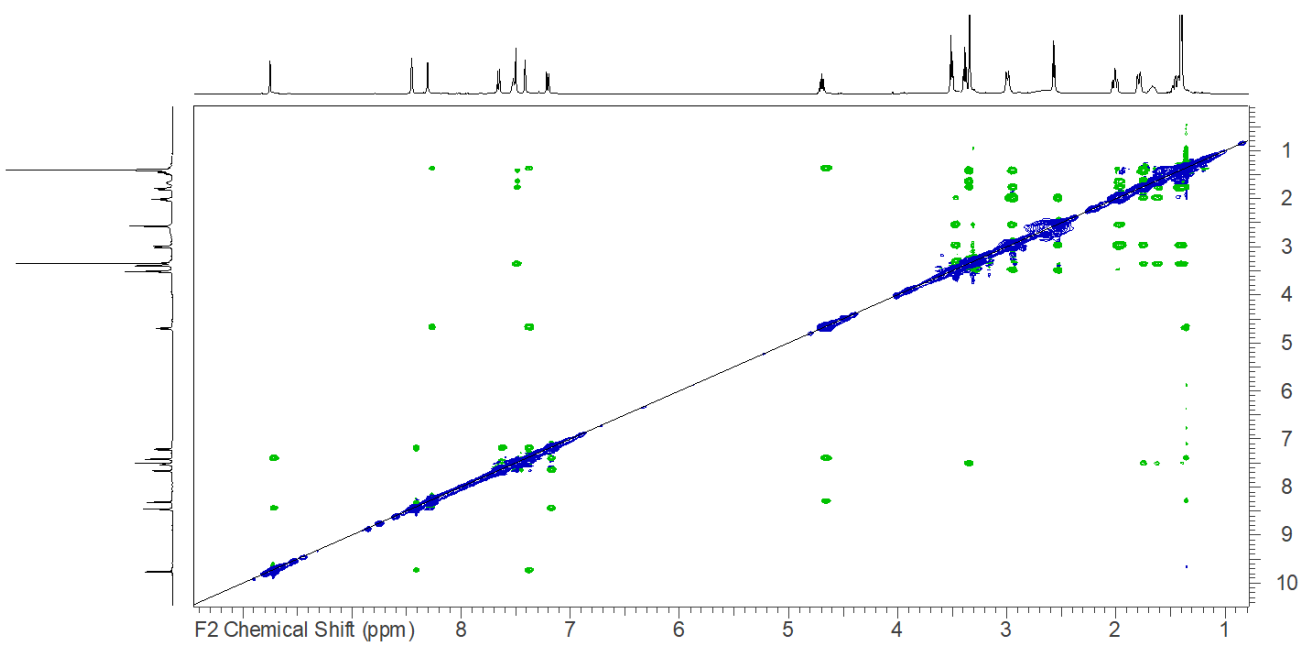

**$^1\text{H}$ - $^{13}\text{C}$  HSQC-DEPT**

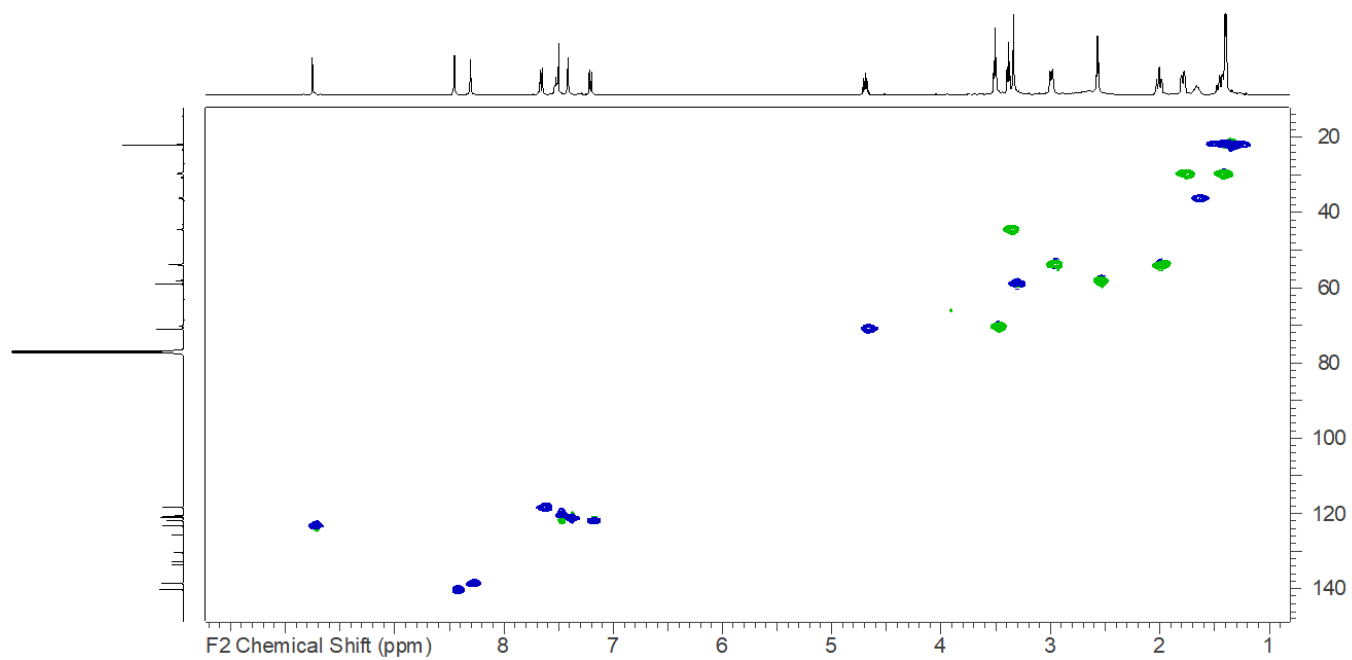

**$^1\text{H}$ - $^{13}\text{C}$  HMBC**

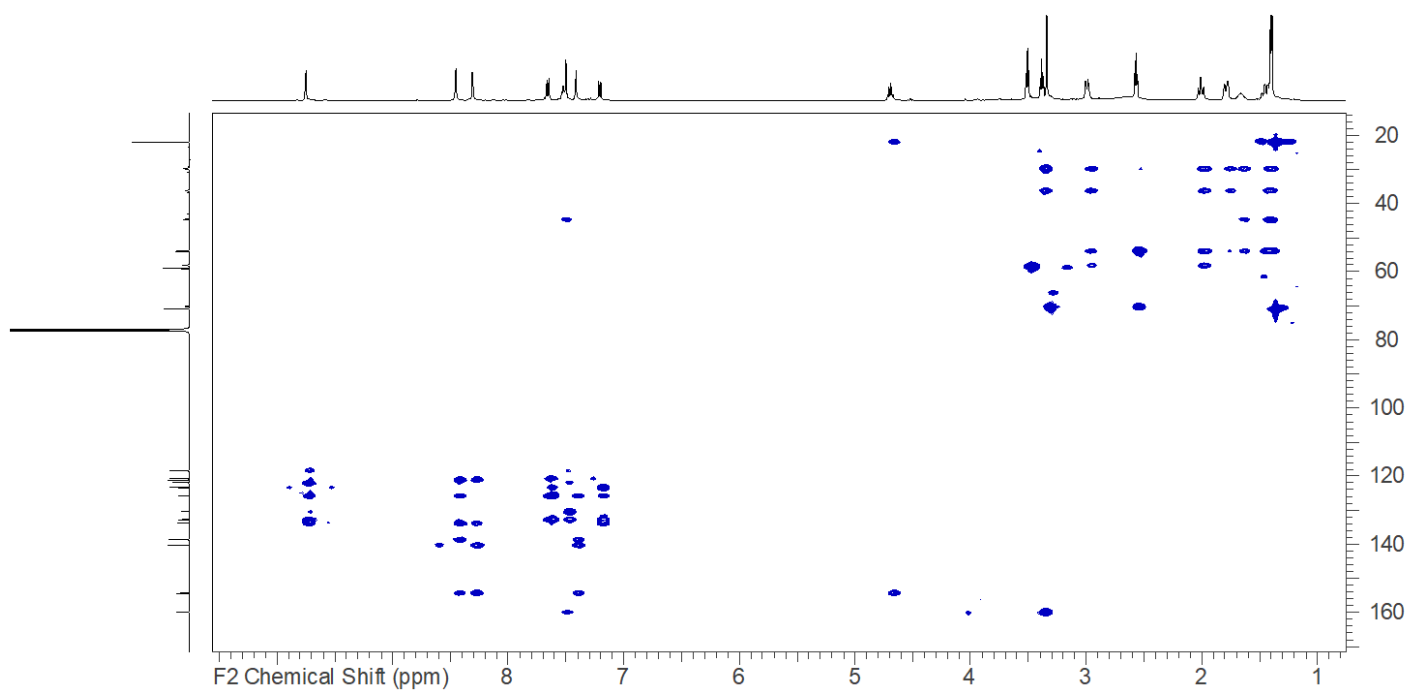

Supplement: molecules-25-02163-s001.pdf [file molecules-25-02163-s001.pdf]
